# Supplementary material for: Network Analysis of Neurodegenerative Disease Highlights a Role of Toll-Like Receptor Signaling
Source: Biomed Res Int. 2014 Jan 16;2014:686505. doi: 10.1155/2014/686505 (PMC3914352; doi:10.1155/2014/686505)
Supplement: Supplementary file 1 — Suppl 1: The list of disease proteins and their corresponding diseases. Suppl 2: The lists of disease proteins occurring in the six corresponding components. Suppl 3: The computations and distribution diagrams for network centrality indices. Each worksheet presents one centrality. Suppl 4: The list of connector proteins of the different diseases. Suppl 5: The ranking of disease association using the network-based approach and the text mining approach. The same disease pair in the different rows is highlighted by the same color. Suppl 6: Network of significantly enriched GO terms. This schematic network illustrates GO terms that were significantly enriched in the ALS-PD (A) and FTD-PD (B) connector proteins, as well as the overlap between related terms. GO terms containing at least 10 connector proteins, and occurring in levels 3-8 of the GO hierarchy were considered in the analysis. Terms that were significantly enriched (p<0.05 after correction for multiple testing) with connector proteins are depicted. Node colours and inset bar indicate the p value for enrichment of each term, after correction for multiple testing. [file 686505.f1.zip › Suppl1_DiseaseProteins_Diseases.xlsx]

## Sheet: Sheet1
Disease Protein	Disease

## Sheet: Sheet2
Disease Protein	Disease	Note
P04156	HD
P20226	HD
Q8WXH2	HD
P42858	HD
P04156	P
Q13148	FTD
P28799	FTD
P49768	FTD
P10636	FTD
P37840	FTD
P55072	FTD
Q99497	FTD
Q16143	FTD
Q96QT4	FTD
P04626	GBM
P51587	GBM
P37231	GBM
P01023	AD
P12821	AD
P00749	AD
Q30201	AD
Q92673	AD
Q13867	AD
Q92870	AD
P05164	AD
Q6ZW49	AD
P03950	ALS
P35637	ALS
P00441	ALS
P12036	ALS
P41219	ALS
Q14203	ALS
Q99497	ALS
Q13148	ALS
Q96QT4	ALS
O95292	ALS
Q96Q42	ALS
Q7Z333	ALS
Q92562	ALS
Q9UQN3	ALS
Q16595	FA
P37840	LBD
Q16143	LBD	have no interaction
P00326	PD
P21917	PD
Q01959	PD
P10636	PD
P37840	PD
P09936	PD
P21675	PD
P20226	PD
P19404	PD
P43354	PD
Q99497	PD
O60260	PD
Q9UGJ0	PD	have no interaction
O60733	PD
Q9NP95	PD
Q9Y3I1	PD
Q96QT4	PD
O43464	PD
Q9BXM7	PD
Q5S007	PD
P09172	PD	have no interaction
Q9NQ11	PD
Q6Y7W6	PD
Q04656	SMA
Q04656	SMA
P22314	SMA
Q9HBA0	SMA
Q16637	SMA
Q16637	SMA
Q9HBA0	SMA
O95292	SMA	have no interaction
O94827	SMA
