# Supplementary material for: Network Analysis of Neurodegenerative Disease Highlights a Role of Toll-Like Receptor Signaling
Source: Biomed Res Int. 2014 Jan 16;2014:686505. doi: 10.1155/2014/686505 (PMC3914352; doi:10.1155/2014/686505)
Supplement: Supplementary file 1 — Suppl 1: The list of disease proteins and their corresponding diseases. Suppl 2: The lists of disease proteins occurring in the six corresponding components. Suppl 3: The computations and distribution diagrams for network centrality indices. Each worksheet presents one centrality. Suppl 4: The list of connector proteins of the different diseases. Suppl 5: The ranking of disease association using the network-based approach and the text mining approach. The same disease pair in the different rows is highlighted by the same color. Suppl 6: Network of significantly enriched GO terms. This schematic network illustrates GO terms that were significantly enriched in the ALS-PD (A) and FTD-PD (B) connector proteins, as well as the overlap between related terms. GO terms containing at least 10 connector proteins, and occurring in levels 3-8 of the GO hierarchy were considered in the analysis. Terms that were significantly enriched (p<0.05 after correction for multiple testing) with connector proteins are depicted. Node colours and inset bar indicate the p value for enrichment of each term, after correction for multiple testing. [file 686505.f1.zip › Suppl2_SixComponents.xlsx]

## Sheet: Component1
ProteinID
O95402
Q9NRI5
Q14982
Q9NY61
Q13535
P23443
Q07817
O15399
Q07812
O43414
O15394
P05121
P05120
Q92806
P29084
P29083
Q92804
Q14974
Q13526
Q6P1Q9
Q13887
P31689
P34947
P51814
P51813
P51812
P25963
P05112
O15020
Q96NN9
Q96QT4
P12273
Q9Y3F4
P12270
O00750
Q13510
P34932
Q9BT17
O15379
P67870
P22695
Q96HA8
P63165
P63162
P24864
Q7Z627
Q9NXR7
Q9Y3E7
P15882
Q13867
Q99873
Q13501
P20151
Q12778
P11171
P38398
P22681
O43741
P23763
P23760
P14784
P22314
O15354
P63146
P80370
Q9NRD5
Q9UBN7
Q71U36
O75582
Q9Y3C7
P48443
Q9NY12
O94985
Q9Y6I3
P14416
Q96AQ9
Q04864
P16949
Q12756
P22301
P21579
O95704
Q9Y6H5
O94973
Q8WW43
P11142
Q14919
Q03405
Q9UER7
O94966
Q10567
Q9BYW2
Q9H9D4
P05412
P30533
P07948
P29375
Q6STE5
P07947
P29372
O14593
O75554
O75553
Q9UBK2
Q99828
P62380
Q9BSJ6
P53041
Q9H013
P55212
P63104
P55210
P35080
Q7L1Q6
P67809
O94941
Q9Y6E0
Q9P0W5
P22626
Q9P0W2
P49848
Q96GY3
P35070
P49841
P29353
P49840
Q8IYB3
P13639
Q68CZ2
P37231
P12544
P31948
P31946
P61266
P31943
Q8IYA7
P31942
Q9P0U4
P99999
P13984
P29692
P01023
P07900
P17096
Q9UKY1
P83916
Q63HR2
Q01892
P49810
P04637
P21860
P01011
O94906
P62330
P53350
P61244
Q86W91
Q8TD16
P04626
Q16143
O14893
Q9UKW4
P78396
Q02962
Q9BVJ6
Q53TM5
Q9H5V8
Q504X9
P26045
P46531
P62318
Q9UKV8
P62316
Q9Y2X7
Q8NDD8
P62314
Q9UKV5
P62312
P62310
Q15047
Q15046
Q08E93
Q8WYP3
P46527
P62308
P62306
Q9Y2W7
P62304
Q9Y385
P20749
P84090
Q9Y2W2
Q9Y2W1
Q15035
P02787
P02786
O14867
Q00403
P43250
Q5EBL8
Q9Y371
Q9UNZ2
Q15388
Q9BYM8
Q8IV54
P27105
Q96AE4
Q01844
O75817
Q08211
O75815
P21810
Q9UKS6
Q15019
P53667
P78352
P12830
Q15011
Q14289
P02768
Q08209
P26368
P26367
P02760
P78347
Q9UKR3
P62993
Q13190
P08047
Q9BYK8
Q15363
Q8IY92
P52565
P52564
Q9NTZ6
P51114
P62988
Q9Y5Y6
P12814
Q8IUQ4
Q9P0L2
Q9P0L0
P10636
P54725
Q00722
Q9UL18
Q9Y337
Q16795
Q9Y333
Q9Y2R2
P53999
Q7KZ85
P11717
P47914
O14818
P04908
Q9UHI8
P46821
P09466
Q9UHI6
P78317
P51451
Q9Y2Q3
P37840
P78314
P00558
P14091
Q15691
Q9P0J0
P07288
Q92797
Q9H8T0
Q9NR28
Q14244
Q92793
Q14240
Q9UKN8
Q08881
Q13155
P84022
Q13153
Q8WVB3
Q9BVA6
O60260
O43390
Q13148
P62945
Q9Y5U2
P00533
P57075
Q9NR09
P60763
P51784
Q13131
O43379
Q13490
O60244
Q15303
P35637
P16591
Q5TCU5
P35998
Q03060
Q9NWZ8
P09429
Q13127
Q13489
Q99497
Q13487
Q13485
P25208
P00519
Q8ND90
P08697
Q9H5J8
Q15653
Q15650
P16220
Q14204
Q14203
Q14565
P32004
Q4W5T8
P15498
Q96TA2
Q05586
Q7Z591
P62913
Q15648
P05067
Q15645
Q15642
Q9H2C0
Q5S007
P07237
Q7Z589
P26639
P09769
Q6LCG8
Q9Y5Q9
Q9Y2K6
Q9Y5Q8
Q53GF4
Q9UKI2
Q15637
P08670
P61812
Q05209
Q9HBA0
P10914
Q99466
Q9Y618
Q99102
Q6MZP7
Q9UNN5
Q9UNN4
P06493
Q99460
O60566
Q8IUH5
O60563
P10909
P27701
Q9NWV8
Q02297
Q13449
Q9NX70
Q86YM7
Q96A83
P30154
P30153
Q96GD4
P60709
Q96PV6
P48039
Q13438
Q13432
P08648
O43678
O15294
O43312
Q96A73
Q9GZQ8
Q14515
Q96PU5
Q9NX58
Q9NX55
Q9UKE5
Q13424
Q13422
Q8ND30
Q9UQQ2
P17612
O15287
P08631
Q96JH7
P16885
O95645
O75155
Q9BRP8
P67775
Q13772
P50616
Q06609
P08621
P49454
P04278
P30480
Q96Q45
O75146
Q96Q42
P04271
Q5JVS0
Q13409
Q05513
P98170
Q13765
Q9UNI1
Q53T94
O15264
O95985
Q9NWQ8
O75494
P98164
Q9NX24
P98160
P17947
Q9UQN3
O60869
O43639
O60506
P49796
O75489
P49792
P13591
Q9UKA9
Q99759
O94888
Q9UQM7
P14678
P17931
P49427
Q9H1Y0
Q9HB96
P57678
Q9H299
Q9UNF0
Q96CV9
Q5T3J3
P63027
Q01130
P07858
Q14814
Q96SU4
P04234
Q9HAW0
Q3V6T2
Q9NQB0
O75460
O94868
Q9UNE7
P06400
Q9BXW9
P14652
P13569
P49768
Q96A00
Q9NTG7
Q96ST3
O14492
Q99728
Q8WV28
O94855
Q9BRJ6
P11021
P49755
P63000
Q9HAU4
O75448
O75446
Q99719
Q6ZW49
P23610
Q01105
Q04721
Q96CS3
Q9HB58
Q86YC2
Q6EEV6
O75439
P21796
Q02548
O75791
Q99704
O94833
Q9BUN8
P14625
P20340
Q96D37
P49736
O15550
Q12962
P10276
Q96PK6
P10275
P62258
P06729
P62253
P56537
P19174
Q9BRG2
P61163
Q8IXA5
Q12959
P46109
P46108
Q9BXS0
O43920
Q96FW1
Q08170
P40818
P29590
Q9UJY5
Q9UJY4
Q8WUM5
P56524
O94811
Q9UQF2
Q12947
Q6NWY9
O75409
Q8TEW6
O75400
Q96D09
O15524
Q12933
Q01780
O14796
P09086
Q53G59
Q9UK80
P28482
Q9BUJ2
Q9BY11
Q9Y297
Q8NFJ9
Q9Y294
Q9UQC2
Q9BUI4
O15503
Q5SXM2
Q12913
Q96IY4
Q08495
O14776
Q53G35
Q9UQB3
P11308
Q9P013
P14923
Q547Q3
Q12906
P35269
P02686
Q9NZJ7
Q8TF42
Q15287
Q969X6
Q9BXM7
P27361
Q14194
Q14191
Q14190
Q8TER5
P01584
Q9UK45
Q9Y265
Q9Y261
A0JLT2
Q9NQ66
P09038
P35240
P54646
Q8TEQ6
P62899
P01574
P20618
P28799
Q70EL1
Q7Z7G1
P56817
Q9UMX0
Q9Y4Z0
Q15262
Q9P2S5
P35237
Q96G01
Q70EK8
Q05193
Q9Y4Y9
Q16342
Q9NWA0
P09382
Q9Y244
Q9H4P4
P02649
P35228
P27695
P02647
P27694
Q14164
P35222
P46736
P35221
P46734
Q00987
P35580
P09012
Q16695
P62877
Q9UGJ0
P42025
Q9Y230
Q86Y79
P19793
P35579
P07197
P07196
O95292
Q14152
P54619
P26599
Q00613
Q00610
O96017
Q15596
Q15233
P19784
P00450
P52799
P35568
P52790
O00291
P20936
P19419
P45983
Q8WXH2
P61769
Q15223
O43294
Q15582
P61764
P00441
Q14139
Q6PIL6
Q9H840
P40189
P01889
Q16665
P28749
P51693
Q9UJM3
Q8WUA4
P45973
Q5VU43
P08253
P19404
Q15573
Q15572
P16144
P11940
Q92673
P62837
Q16653
Q13393
P20916
P08246
Q5VTR2
P08243
Q5VWX1
Q8IZX4
O95257
P24385
P41252
P18669
Q96J02
O00268
Q13387
P62826
P08238
Q9H1D9
O60496
P00414
Q96LT9
P07148
P35520
Q16637
Q13011
Q8WXD5
P42684
Q15545
O43255
Q15544
P42681
Q15543
P42680
Q15542
Q96CA5
Q86Y13
P27986
Q14457
Q8N2W9
P07498
P10827
P10826
Q14451
P43405
O00244
Q16623
Q13363
P42679
P09661
Q14CS0
Q9C005
P08579
P28702
P08575
Q8IX01
P00750
P35869
P52735
P41220
Q14444
P52732
Q92994
O00237
Q92993
Q9UPT6
P09651
Q15527
P31150
P00749
O43236
P00747
O95218
Q92625
P10809
Q5TEW3
P23258
Q14790
O00221
P17535
P42658
P25789
P25788
P25786
P00734
Q9P2H0
O75077
P07101
O00214
O00213
Q9NW64
P23246
Q30201
Q8NC44
O15198
O75069
Q59EM9
O00567
P60953
Q9UPQ9
Q13322
Q01085
Q01082
Q15853
Q8IZQ1
Q92956
P68402
P68400
Q99689
P04180
Q13315
Q13671
Q07954
Q04695
Q969H0
Q15843
P55072
Q9NPF8
P07437
P98077
O00548
Q13309
Q02156
Q9Y4K3
Q04323
Q15835
Q9H4B4
O15162
Q92934
Q8WU68
P09958
Q9BTT4
Q969F0
Q9BTT0
P15309
P04156
Q8N5U6
Q7Z406
Q9NYV6
P04150
Q9NVP2
Q6ZV89
Q13642
Q99650
P14210
Q96LJ8
P55040
P05231
Q76N89
O75376
Q92913
P12036
O94776
P09936
Q969D9
Q9UMF0
Q04656
P13473
O75369
Q96RU7
O75368
Q92905
O00507
Q6P2Q9
P40763
P62191
O60739
Q9BX84
P63279
Q96S59
P49662
Q96RT1
Q9NZ45
Q6S5L8
Q9NZ42
Q13617
Q13616
Q5VTD9
P20265
Q8WU20
O15479
O15116
P14543
Q12888
Q96BT3
O95835
P32856
P28074
Q6ZUS6
Q99972
P61086
P11277
O60716
Q12873
P54278
P54277
Q8TAT6
Q5THR3
P21333
Q9NSE2
P28069
P23508
Q99607
P20248
P48552
Q99967
Q99963
Q13952
P03372
Q96BR9
P49639
P46379
Q96C32
Q5UIP0
O95819
P63244
Q59EC8
Q12860
O75688
P48549
P62158
P24941
P07711
Q71V34
P48544
Q99959
P31749
Q5VWG9
Q99952
Q02790
Q9H0S4
O15446
Q9BQG0
P54259
P54257
P21675
P54252
P20226
P20585
Q9H0R8
P14867
Q12846
Q9H492
P24928
P04439
O75306
Q02779
P15941
P62491
Q02410
P14859
Q9BQE4
Q9BTK6
O15428
P10145
P82979
Q6Y7W6
Q8IZD9
P55317
A5YKK6
P22736
P63208
Q9BZV1
Q9HCU9
P30622
P46695
P29466
P15927
Q6FI68
Q9P287
P38432
Q9NP95
P04406
P28360
Q04917
Q01658
Q09472
O75629
Q96RK4
P01138
P01137
P01135
P01133
P21980
P25098
P19013
P10109
Q6PKX4
O14656
P01127
O14654
Q93009
P28347
Q15172
P49918
P49915
P43034
Q9NP64
Q7Z6G8
Q9ULX6
O75962
Q9ULX3
Q49A88
Q9H0K1
Q96BI3
P05814
Q00535
Q00534
P01106
P01100
Q9ULW3
Q01970
Q7Z6E9
Q16236
Q8TAI1
Q16595
Q16594
O14981
Q9Y490
P25054
P47710
P16070
P07093
O14618
P43004
Q9NP31
Q9NRX3
O14613
O75935
P43360
P12956
P03973
Q01959
Q92598
Q92597
P41180
P43357
P10415
P43354
O75928
O00193
O14964
O75925
Q9Y478
P53778
P45880
Q9BWG6
Q15121
P36542
P68036
O00186
P21917
O00182
O75914
Q9UM47
Q8NHG7
Q15119
P12931
O43187
P20823
Q7L5N1
Q86TM6
Q9HCK8
O95163
Q92575
P60568
P51587
P09234
Q9H0E9
P17480
Q15466
O43175
P41159
Q06124
Q92569
Q9H6Q3
O95155
Q06481
P18206
Q00839
Q14011
Q05397
O14936
Q16548
O14933
Q5H9L4
Q9Y446
Q5H9L2
P23193
Q13283
P51571
Q9BQ83
Q9H0D6
P08133
O95149
Q96EH3
P52657
P52655
P68366
P46934
Q16539
P42229
Q13275
Q16533
P62714
P42224
Q9Y6X2
P36508
O60383
P61626
O95139
Q96NY7
Q9NRR8
Q92542
Q08999
P60896
O00141
Q9Y3Q8
Q5VT06
P42575
P22087
P42574
Q15436
Q15796
P61978
Q96L34
Q8N1V2
Q92530
Q92890
Q16514
Q16512
P42566
P08107
Q9UP52
Q15428
Q15788
Q15785
P61964
O76071
Q92529
Q9H9S3
Q14697
P35754
Q92882
O00124
P60510
P09543
P51532
Q07889
Q9UIG0
Q15418
O60356
P25685
Q15776
Q8IVM0
Q9HCE7
Q92876
Q14686
P32121
Q92870
Q13239
Q9UIF8
Q5U5U6
Q6P1X5
Q9BZE9
P16333
Q9NV58
Q13224
Q8NDX6
Q9BT88
Q99590
O60337
P83369
Q53QZ3
O43464
Q9H3D4
Q9HCC9
P04085
O00459
Q9UBW7
P04083
Q7Z333
Q9Y6R0
Q6GYA4
P05164
Q96KM6
P30281
P27824
P18848
O95793
Q92841
Q16827
O00443
Q9Y6Q9
P23471
P14136
P23470
Q13562
P06241
O60313
O60674
O60671
Q03135
O95425
Q92834
Q92831
P40337
O75293
Q99569
P06239
P23467
Q16816
P51843
P50750
P21283
P23458
Q05655
Q9UBT2
Q8WVZ9
Q99551
P42858
P17735
Q9Y3I1
Q04206
Q15717
O43781

## Sheet: Component2
ProteinID
P60484
P19883
Q8TCC1
P35609
Q15904
P32971
P13489
P68032
P03950
P13385

## Sheet: Component3
ProteinID
Q9BSG0
P09172
Q15811

## Sheet: Component4
ProteinID
P50052
P12821
P30411
P21964

## Sheet: Component5
ProteinID
P20700
P23942
P41219
Q9Y4I1
P19012

## Sheet: Component6
ProteinID
Q08AM6
Q92562
