# Supplementary material for: Network Analysis of Neurodegenerative Disease Highlights a Role of Toll-Like Receptor Signaling
Source: Biomed Res Int. 2014 Jan 16;2014:686505. doi: 10.1155/2014/686505 (PMC3914352; doi:10.1155/2014/686505)
Supplement: Supplementary file 1 — Suppl 1: The list of disease proteins and their corresponding diseases. Suppl 2: The lists of disease proteins occurring in the six corresponding components. Suppl 3: The computations and distribution diagrams for network centrality indices. Each worksheet presents one centrality. Suppl 4: The list of connector proteins of the different diseases. Suppl 5: The ranking of disease association using the network-based approach and the text mining approach. The same disease pair in the different rows is highlighted by the same color. Suppl 6: Network of significantly enriched GO terms. This schematic network illustrates GO terms that were significantly enriched in the ALS-PD (A) and FTD-PD (B) connector proteins, as well as the overlap between related terms. GO terms containing at least 10 connector proteins, and occurring in levels 3-8 of the GO hierarchy were considered in the analysis. Terms that were significantly enriched (p<0.05 after correction for multiple testing) with connector proteins are depicted. Node colours and inset bar indicate the p value for enrichment of each term, after correction for multiple testing. [file 686505.f1.zip › Suppl3_CentralityIndices.xlsx]

## Sheet: Degree
UniprotID	Degree
P04626	133
P20226	125
P04156	83
Q16637	82
P55072	78
P37840	72
O60260	67
P49768	67
P42858	64
P10636	58
P37231	57
Q14203	51
P35637	49
P01023	47
P21675	44
P51587	42
P22314	31
Q6Y7W6	30
P43354	28
P09936	26
P28799	19
O43464	18
P00749	17
Q9HBA0	16
Q13148	16
Q99497	16
Q9UGJ0	15
P00441	14
Q9Y3I1	14
Q9UQN3	12
Q96QT4	12
P62988	12
O95292	12
Q01959	11
Q6ZW49	10
Q13867	9
P62993	9
P05067	9
Q16143	9
P19404	8
P21917	8
Q92870	7
P04637	6
P42574	6
Q30201	5
P12036	5
P49841	5
Q9UNE7	5
P63279	5
P35222	5
Q92673	5
P00533	4
P40337	4
P07437	4
P29466	4
P24928	4
P63104	4
P19793	4
P19174	4
Q7Z333	4
P11142	4
P06241	4
Q9BXM7	4
Q04656	4
Q14790	3
Q13322	3
P68400	3
P11021	3
Q92793	3
P46527	3
P62158	3
P00519	3
P23246	3
P54257	3
Q92905	3
Q13616	3
P28482	3
P16333	3
P01106	3
Q16594	3
P02649	3
Q13190	3
Q9UQF2	3
Q00535	3
Q9Y4K3	3
P31946	3
Q16623	3
P08107	3
Q04206	3
Q9H3D4	3
Q15796	3
Q9NRD5	3
O60869	3
P06400	3
P62380	3
P07900	3
P28702	3
O43236	3
P78352	3
P10415	3
O00268	3
Q8WXH2	3
Q16595	3
P13569	3
P06493	3
P38398	3
P55212	3
P55210	3
Q96S59	2
P46109	2
P06239	2
P56537	2
Q9UJY4	2
P35269	2
Q9NPF8	2
P62330	2
Q8NFJ9	2
Q969H0	2
Q9UBN7	2
P10275	2
O00141	2
Q9Y385	2
P62899	2
P50616	2
Q00987	2
P03372	2
Q16695	2
Q00613	2
P09429	2
Q01082	2
P16885	2
Q09472	2
P67775	2
P22695	2
P00747	2
P28360	2
Q04917	2
O60739	2
P49639	2
P46379	2
Q14164	2
Q16512	2
P24385	2
Q9UQM7	2
P10909	2
P42566	2
Q15545	2
Q15544	2
Q15543	2
Q14194	2
Q15542	2
Q9ULW3	2
O00213	2
P09012	2
Q15835	2
Q9Y490	2
P07947	2
P17480	2
Q9UNZ2	2
P05412	2
P18206	2
P20936	2
Q13490	2
Q15011	2
Q96CV9	2
P12931	2
P07197	2
Q9BY11	2
Q96ST3	2
O94985	2
Q16548	2
Q5H9L4	2
Q9Y2R2	2
P52655	2
P12830	2
Q15788	2
P49662	2
Q16514	2
Q14686	2
P14678	2
P23508	2
Q06481	2
Q6P1X5	2
P68036	2
P21333	2
P07858	2
Q5VTD9	2
Q15653	2
Q53QZ3	2
P09769	2
Q9Y6Q9	2
Q9BXW9	2
Q99728	2
P68366	2
Q7L5N1	2
Q03135	2
P13473	2
Q96L34	2
Q8IVM0	2
Q15418	2
Q15717	2
P19419	2
P27824	2
P61764	2
P16220	2
Q07817	2
Q12933	2
Q15287	2
Q92804	2
P29083	2
P25685	2
Q13526	2
P54259	2
Q14152	2
P61769	2
Q13501	2
Q9UHI6	2
P31749	2
O60674	2
P17947	2
Q71U36	2
P26045	2
O75376	2
P19784	2
P01584	2
Q9Y6H5	2
P05164	2
Q13510	2
Q96Q42	2
Q8N2W9	2
Q13363	2
Q08211	2
P49848	2
P34932	2
P24864	2
O60716	2
Q92956	2
P46934	2
P32121	2
O15503	2
P67809	2
P35221	2
P02787	2
P01100	2
Q15388	2
P43250	2
P08670	2
Q14289	2
P46821	2
P26367	2
P34947	2
P00450	2
P53999	2
Q7Z6E9	2
P51784	2
Q8WUM5	2
P25054	2
P53350	2
P12814	2
Q5S007	2
Q9NV58	2
P08047	2
Q12906	2
Q9Y618	2
P07948	2
A0JLT2	2
Q96A73	2
P11308	2
P84022	2
Q12962	2
P62258	2
P56524	2
O96017	2
P63165	2
O15264	2
P20248	2
P14923	2
P30480	2
O75815	2
P08238	2
P45983	2
P27986	2
P43405	2
Q14451	2
P08246	1
P23258	1
Q9NW64	1
Q96RK4	1
O94941	1
P25789	1
P25786	1
P40763	1
Q05513	1
P17612	1
Q9Y294	1
Q96RT1	1
Q6S5L8	1
P07093	1
Q9BQ83	1
P20265	1
Q8WU20	1
O75306	1
Q92797	1
Q6FI68	1
P48552	1
P68402	1
P14652	1
Q9BVA6	1
Q9NSE2	1
P04908	1
Q99967	1
Q9H4B4	1
Q9BTT0	1
Q13952	1
O14796	1
Q59EC8	1
Q71V34	1
O75554	1
Q9NQB0	1
Q99952	1
Q5VWG9	1
O43294	1
Q9UK80	1
Q92882	1
O95155	1
Q13642	1
Q9HB58	1
P20340	1
O15116	1
Q13127	1
Q9H0R8	1
Q92913	1
Q9BYM8	1
P02760	1
Q969D9	1
O00186	1
P15941	1
Q9UKR3	1
P60709	1
Q9HCE7	1
P21283	1
P52564	1
Q04721	1
Q9NZ45	1
Q15642	1
P21796	1
P55317	1
Q9P0W5	1
O43781	1
Q13315	1
P28069	1
Q9Y337	1
O95163	1
O14893	1
P13639	1
Q02962	1
P14784	1
Q92841	1
Q8IUH5	1
Q13309	1
Q6ZUS6	1
Q9UHI8	1
Q99959	1
P09466	1
Q14444	1
Q9NX70	1
P14091	1
Q9BX84	1
Q01658	1
O75146	1
P07288	1
P28749	1
P48039	1
Q12860	1
O60566	1
P17735	1
O75448	1
Q6PKX4	1
O75368	1
Q15436	1
O43255	1
Q9H0S4	1
P28347	1
O43379	1
Q96C32	1
Q9NX55	1
O60356	1
P82979	1
Q547Q3	1
Q7Z6G8	1
P10276	1
P52790	1
Q9Y5U2	1
Q9C005	1
Q16236	1
Q9UQB3	1
Q9UKV5	1
P26599	1
P30154	1
Q9Y3F4	1
Q9P0J0	1
P14416	1
Q9NZJ7	1
Q9NR28	1
P04439	1
Q96HA8	1
P47914	1
P46695	1
P36542	1
P16070	1
Q9NP31	1
O94833	1
P54278	1
P61812	1
P54277	1
P49427	1
P18669	1
Q9H2C0	1
P08621	1
Q9NR09	1
P56817	1
O14492	1
Q9UMX0	1
Q96KM6	1
P45880	1
P06729	1
P09086	1
Q9NY12	1
P63027	1
Q9HCK8	1
P05121	1
P05120	1
P49918	1
Q13489	1
P63244	1
Q13424	1
Q9H0E9	1
Q9NP64	1
Q15466	1
Q92834	1
P63208	1
P12270	1
P09234	1
Q06124	1
Q92569	1
Q9H6Q3	1
P57678	1
Q05397	1
Q9ULX3	1
Q99551	1
P23193	1
O14654	1
Q5THR3	1
Q96BT3	1
Q9NRI5	1
P52657	1
P52799	1
Q00722	1
Q96PU5	1
Q16533	1
P42224	1
P36508	1
Q9Y6X2	1
Q5VT06	1
P49755	1
Q8TAI1	1
P04278	1
Q6PIL6	1
P17535	1
Q9NRR8	1
P42025	1
Q9P287	1
Q9UNI1	1
P14136	1
P61978	1
Q9NVP2	1
P61163	1
Q59EM9	1
P51532	1
Q92529	1
Q9NRX3	1
Q8WVZ9	1
Q6NWY9	1
Q03405	1
Q9BWG6	1
Q07889	1
P09661	1
P17931	1
O15198	1
O15428	1
Q04695	1
Q96D09	1
Q92876	1
Q15843	1
Q13239	1
P21579	1
P02768	1
Q9Y446	1
P08631	1
Q92993	1
Q8TER5	1
O60383	1
Q5H9L2	1
O75817	1
P00734	1
O14656	1
P62316	1
Q14011	1
P98170	1
Q13485	1
P09382	1
Q9NWQ8	1
O14933	1
Q9Y6R0	1
O95149	1
P12956	1
O14867	1
Q16827	1
O60506	1
Q9UBT2	1
P23471	1
Q15428	1
P23470	1
Q96RU7	1
Q13432	1
P51843	1
Q9UNN5	1
P62314	1
Q9Y3Q8	1
P83369	1
P23467	1
Q9Y2W1	1
O15524	1
Q7L1Q6	1
Q9UIG0	1
P23458	1
Q14240	1
O75069	1
O14613	1
P61964	1
Q9P0L0	1
Q96AE4	1
P46736	1
Q8IXA5	1
P02686	1
P35228	1
P09543	1
P62312	1
O95704	1
Q15776	1
O43187	1
O75446	1
Q07812	1
O15550	1
Q9UIF8	1
Q7Z627	1
P10109	1
Q9UBW7	1
P29084	1
Q96JH7	1
P51813	1
Q13887	1
Q9HCU9	1
Q5U5U6	1
O75077	1
P29590	1
Q8NDX6	1
Q76N89	1
P01574	1
Q14697	1
Q9HCC9	1
Q12778	1
Q13224	1
O00548	1
Q9BT88	1
Q9Y333	1
P15882	1
Q9NP95	1
Q00839	1
Q8TD16	1
P60896	1
Q96IY4	1
P35580	1
Q9Y297	1
P43360	1
P48443	1
Q99759	1
P23760	1
Q9UMF0	1
Q53G59	1
Q8N1V2	1
Q12756	1
Q9UER7	1
O15294	1
O60671	1
Q5VWX1	1
Q9Y478	1
Q70EL1	1
Q04864	1
P15927	1
Q9NZ42	1
P04234	1
Q9Y5Y6	1
Q14982	1
Q14919	1
Q9Y2K6	1
P09038	1
P51814	1
O43920	1
Q6STE5	1
Q9UBK2	1
Q10567	1
P10826	1
Q13011	1
O94811	1
O15162	1
Q9NWZ8	1
Q14974	1
P11717	1
P29375	1
Q99873	1
Q96NN9	1
O75791	1
Q00534	1
P19013	1
P31689	1
Q96CS3	1
Q9BT17	1
Q6EEV6	1
P67870	1
P30622	1
Q9BUN8	1
P35070	1
P29353	1
Q53GF4	1
O15020	1
P04406	1
P23610	1
Q49A88	1
Q68CZ2	1
Q92831	1
Q9P2H0	1
Q92530	1
P62491	1
Q02410	1
Q8IYA7	1
Q15582	1
Q9P0U4	1
Q9UKS6	1
P99999	1
O43414	1
P07101	1
Q9Y2Q3	1
Q9UP52	1
Q15691	1
Q9GZQ8	1
P08253	1
Q8IZD9	1
O15379	1
Q9H8T0	1
Q96PV6	1
P42575	1
Q63HR2	1
P01135	1
Q01892	1
P08697	1
O75582	1
Q9UKV8	1
O75553	1
Q13535	1
Q8IZQ1	1
P21860	1
O14936	1
O43741	1
P03973	1
O94973	1
Q99689	1
P31943	1
Q9Y2W2	1
Q9UKW4	1
Q9H9D4	1
Q08999	1
P54252	1
P29372	1
Q5VTR2	1
P01133	1
Q9BSJ6	1
Q8WYP3	1
Q9BTT4	1
Q8IYB3	1
Q99607	1
Q9NXR7	1
Q5JVS0	1
P20749	1
Q15035	1
Q14204	1
Q96SU4	1
Q86Y13	1
P25963	1
Q00403	1
P11277	1
Q14244	1
Q14191	1
Q9H492	1
Q9NTZ6	1
Q96BI3	1
P04150	1
P31948	1
P30533	1
Q15233	1
Q15019	1
P61244	1
O75962	1
Q9BYK8	1
Q9P2S5	1
O75914	1
P38432	1
Q5T3J3	1
Q9Y244	1
Q96CA5	1
O94966	1
P60953	1
Q02790	1
P27361	1
P32856	1
Q8IUQ4	1
O00221	1
P61086	1
Q7Z406	1
P04180	1
Q12873	1
Q7KZ85	1
P09651	1
P98164	1
Q07954	1
O00237	1
P46531	1
Q9H5V8	1
Q99963	1
P78396	1
Q08E93	1
P51451	1
Q9UM47	1
P78314	1
P78317	1
P51571	1
Q9P0W2	1
O95139	1
Q14139	1
Q08881	1
Q9UKN8	1
Q13153	1
Q8NDD8	1
Q16665	1
P18848	1
A5YKK6	1
P20618	1
P21810	1
P27695	1
Q96BR9	1
Q8IV54	1
P04271	1
P17096	1
O15446	1
O94888	1
P08243	1
Q02779	1
P52565	1
P55040	1
P05231	1
O75369	1
Q7Z591	1
P78347	1
O95257	1
O14593	1
Q15303	1
O60244	1
P16591	1
Q5TCU5	1
O60563	1
P35998	1
Q03060	1
P62308	1
P53667	1
Q92542	1
Q01780	1
O60337	1
P50750	1
Q15172	1
P04083	1
Q13487	1
P25208	1
Q9H5J8	1
Q15648	1
Q15650	1
P15498	1
Q9BTK6	1
P08579	1
Q96J02	1
O75688	1
Q14CS0	1
Q9UL18	1
O95985	1
Q9NWV8	1
Q9Y5Q9	1
P62306	1
Q9Y5Q8	1
Q99972	1
Q9UKI2	1
Q99460	1
Q05209	1
O14818	1
O95425	1
Q99102	1
P26368	1
Q9UNN4	1
P11171	1
Q12888	1
P43004	1
P27701	1
P16949	1
Q02297	1
O60313	1
Q99590	1
Q9ULX6	1
Q96A83	1
Q13155	1
P62945	1
Q9UK45	1
Q8WVB3	1
P53778	1
Q9UNF0	1
P42229	1
P08648	1
Q13438	1
P62310	1
O15399	1
Q8TEQ6	1
Q05586	1
O75629	1
Q9Y4Z0	1
O95835	1
P80370	1
Q9UQQ2	1
Q13422	1
P57075	1
P48549	1
Q13772	1
P48544	1
P60763	1
P10145	1
Q96AQ9	1
Q9Y4Y9	1
Q9NWA0	1
P22087	1
Q99569	1
P26639	1
Q15637	1
P32004	1
Q04323	1
P54725	1
O43678	1
O15479	1
P43357	1
Q13765	1
P07237	1
O94776	1
Q53T94	1
P30153	1
Q14457	1
P62714	1
Q15645	1
P62913	1
P01011	1
O15354	1
Q15119	1
P01138	1
P01137	1
Q96LJ8	1
Q6P1Q9	1
Q9H840	1
P43034	1
Q13449	1
Q9NX58	1
Q53G35	1
P01127	1
P35237	1
Q3V6T2	1
Q9H299	1
Q9H0D6	1
P62191	1
O14964	1
O75409	1
Q14814	1
Q9HAW0	1
Q86YM7	1
P35754	1
Q13617	1
Q14515	1
P07196	1
P49915	1
P24941	1
Q8ND30	1
Q8WV28	1
Q14565	1
P12273	1
Q9BRP8	1
Q8WXD5	1
Q8TAT6	1
P46734	1
Q6MZP7	1
Q01105	1
Q96Q45	1
Q96G01	1
Q7Z589	1
O60496	1
Q9UKA9	1
P83916	1
Q02548	1
Q99704	1
Q01844	1
P14625	1
Q8WW43	1
Q96D37	1
Q93009	1
Q9NX24	1
P49736	1
O95218	1
Q9BRG2	1
Q01130	1
P22626	1
P13591	1
P46108	1
P00558	1
Q9BXS0	1
Q16816	1
Q92598	1
P05814	1
O75155	1
Q99828	1
P49796	1
P49792	1
Q96GD4	1
Q12947	1
Q9BQE4	1
Q05655	1
P60568	1
P13984	1
P62877	1
Q8TEW6	1
P11940	1
P41159	1
Q9HAU4	1
Q70EK8	1
Q9BUJ2	1
Q9NY61	1
P23443	1
Q9BZV1	1
P47710	1
P29692	1
Q96A00	1
P08133	1
O95645	1
O00244	1
O75494	1
O00291	1
Q13562	1
O94906	1
P51812	1
P00750	1
Q9BRJ6	1
O14618	1
Q9UQC2	1
Q06609	1
P49454	1
P61626	1
P41180	1
Q9BUI4	1
Q12913	1
P35579	1
Q5SXM2	1
Q96PK6	1
O00214	1
Q15121	1
P35520	1
O75935	1
Q08495	1
Q9Y6E0	1
Q13275	1
P63000	1
Q96FW1	1
Q99719	1
O00567	1
Q5EBL8	1
Q08170	1
P49810	1
P63162	1
Q15046	1
P14867	1
P40818	1
Q86W91	1
Q6P2Q9	1
Q9Y265	1
Q96NY7	1
O00193	1
Q9Y261	1
O94868	1
Q53TM5	1
Q9HB96	1
P62253	1
P35240	1
Q9H0K1	1
Q9UPT6	1
Q7Z7G1	1
Q12959	1
Q16539	1
P52732	1
Q01970	1
Q15262	1
Q13131	1
O75460	1
O15287	1
Q9Y2W7	1
Q08209	1
P04085	1
Q9Y230	1
P23763	1
Q15596	1
O75489	1
P51114	1
Q92597	1
P53041	1
Q00610	1
O95793	1
Q12846	1
O14776	1
Q9Y3C7	1
Q86YC2	1
P35568	1
P14210	1
P28074	1
P27105	1
Q9P013	1
Q5UIP0	1
Q16795	1
Q8NHG7	1
Q15363	1
P49840	1
Q86TM6	1
P40189	1
O95402	1
O76071	1
Q969X6	1
Q92575	1
Q9UJM3	1
Q8WUA4	1
Q9BQG0	1
O75928	1
P45973	1
Q01085	1
P16144	1
O00443	1
Q15573	1
Q15572	1
O95819	1
Q8TF42	1
Q8NC44	1
Q9BYW2	1
O00507	1
Q13393	1
Q14190	1
O00459	1
Q8IZX4	1
O94855	1
P14543	1
P41252	1
P09958	1
Q13387	1
O75400	1
O75925	1
Q9H1D9	1
P05112	1
Q05193	1
O15394	1
P31150	1
P54646	1
Q9UJY5	1
P30281	1
O43390	1
P42684	1
P42681	1
P42680	1
Q9Y3E7	1
Q16342	1
Q9NQ66	1
Q86Y79	1
P42679	1
Q9H4P4	1
Q92806	1
P20151	1
Q92890	1
P07711	1
P60510	1
P08575	1
Q9Y6I3	1
P52735	1
P62304	1
P35869	1
P61266	1
O00124	1
Q15785	1
Q92994	1
Q9H9S3	1
P20823	1
P00414	1
Q9UKY1	1
Q9UKE5	1
Q92625	1
Q5TEW3	1
Q9UPQ9	1
P22681	1
Q15223	1
Q504X9	1
O43175	1
O43639	1
P22301	1
Q9BZE9	1
P51693	1
P63146	1
Q4W5T8	1
Q96GY3	1
Q5VU43	1
Q96TA2	1
P07148	1
Q8ND90	1
P98160	1
Q96EH3	1
P02647	1
Q9BVJ6	1
Q16653	1
P62826	1
O00182	1
P54619	1
P62318	1
P20916	1
Q6LCG8	1
Q15047	1
Q9Y2X7	1
P22736	1
Q6GYA4	1
Q8WU68	1
O75439	1
Q99466	1
Q96LT9	1
Q13671	1
P31942	1
Q9H013	1
P62837	1
P98077	1
Q9H1Y0	1
P01889	1
P27694	1
Q02156	1
Q9P0L2	1
Q8IX01	1
P07498	1
P84090	1
O14981	1
P35080	1
Q13409	1
Q9Y371	1
Q92934	1
P20585	1
P21980	1
Q9NTG7	1
P10827	1
Q13283	1
Q969F0	1
P02786	1
P15309	1
Q8N5U6	1
Q15527	1
Q9NYV6	1
Q6ZV89	1
P12544	1
O00750	1
P25098	1
Q99650	1
P14859	1
P41220	1
P10809	1
O75293	1
P10914	1
P42658	1
O43312	1
P25788	1
Q8IY92	1
Q15853	1

## Sheet: Closeness
UniprotID	Closeness
P10636	0.0002826
P62993	0.0002768
P37840	0.0002732
P20226	0.0002728
P04626	0.0002704
Q14203	0.000267
P62988	0.0002669
P04156	0.0002663
P42858	0.0002658
P49768	0.0002614
P09936	0.0002601
P55072	0.0002595
P35637	0.0002583
P51587	0.0002579
O60260	0.0002556
Q16637	0.0002491
Q9UNE7	0.000247
P21675	0.0002467
P05067	0.0002467
P37231	0.0002465
P22314	0.0002456
P07437	0.0002435
P42574	0.0002426
P04637	0.0002391
P49841	0.0002385
P78352	0.0002382
P63104	0.000237
P29466	0.0002366
P00519	0.000236
Q9UQF2	0.0002358
Q6Y7W6	0.0002356
P19174	0.0002355
P01023	0.0002352
P02649	0.0002352
P68400	0.0002335
P55212	0.000233
P11142	0.0002327
P19793	0.0002321
P24928	0.0002311
P35222	0.0002308
P16885	0.0002306
P00533	0.0002304
P62258	0.00023
Q13148	0.0002297
Q96L34	0.0002297
P31749	0.0002294
P06241	0.0002278
P01106	0.0002276
P09769	0.0002271
Q14289	0.0002271
P43405	0.0002271
Q01959	0.000227
P03372	0.0002267
P07900	0.0002261
P62380	0.0002259
O00141	0.0002255
P67775	0.0002255
P06493	0.0002255
O00213	0.0002243
Q03135	0.0002243
Q9ULW3	0.0002243
P54257	0.0002241
P00441	0.0002238
Q9NPF8	0.0002237
Q53QZ3	0.0002237
P19784	0.0002237
Q96A73	0.0002237
Q92793	0.0002233
P55210	0.0002228
P20936	0.0002228
P62158	0.0002224
Q15653	0.0002219
O60869	0.0002218
P06400	0.0002218
P28702	0.0002217
P31946	0.0002213
Q9Y4K3	0.0002211
Q13526	0.0002211
Q13501	0.0002211
P28482	0.0002208
P45983	0.0002205
P22695	0.0002204
P10415	0.0002199
Q08211	0.0002199
Q15418	0.0002196
Q01082	0.0002195
P08670	0.0002195
P16333	0.0002193
Q15788	0.0002191
Q14686	0.0002191
Q9Y6Q9	0.0002191
O94985	0.0002189
P43354	0.0002187
P12830	0.0002187
P35221	0.0002187
P14923	0.0002187
P27986	0.0002187
Q16594	0.0002186
Q96CV9	0.0002185
O75376	0.0002185
Q13616	0.0002182
Q04206	0.0002182
Q07817	0.0002179
O60716	0.0002179
Q14790	0.0002178
Q00535	0.0002178
Q13190	0.0002175
O00268	0.0002172
Q9H3D4	0.0002172
Q15717	0.0002168
Q16143	0.0002166
Q15011	0.0002165
Q9Y2R2	0.0002163
O60674	0.0002163
P26045	0.0002163
Q9HBA0	0.0002159
P17947	0.0002159
P01584	0.0002159
P40337	0.0002156
Q9UBN7	0.0002156
P46379	0.0002156
P23246	0.0002154
P18206	0.000215
Q13363	0.0002149
P08047	0.0002149
P38398	0.0002149
Q92905	0.0002148
Q9Y490	0.0002145
P13473	0.0002145
O75815	0.0002145
Q14451	0.0002145
Q09472	0.0002144
P56524	0.0002144
Q9UQM7	0.0002143
P68366	0.0002143
P24864	0.0002135
P34932	0.0002129
P08107	0.0002128
O43236	0.0002128
Q04917	0.0002127
Q71U36	0.0002127
Q9Y6H5	0.0002127
Q5S007	0.0002127
Q13322	0.0002122
Q14164	0.0002119
P23508	0.0002119
Q9NRD5	0.0002116
Q969H0	0.0002115
Q16512	0.0002115
P61764	0.0002115
P21917	0.0002114
Q96S59	0.0002113
P60709	0.0002112
O15428	0.0002112
Q8TER5	0.0002112
O15294	0.0002112
O75582	0.0002112
P11277	0.0002112
P04271	0.0002112
Q15172	0.0002112
P43004	0.0002112
P53778	0.0002112
P62714	0.0002112
Q16816	0.0002112
Q05655	0.0002112
Q9NY61	0.0002112
P23443	0.0002112
P51812	0.0002112
P53041	0.0002112
O95793	0.0002112
P49840	0.0002112
O00507	0.0002112
Q9P0L2	0.0002112
P10909	0.000211
P49662	0.000211
O96017	0.0002107
P25054	0.0002104
Q12906	0.0002104
Q8IVM0	0.0002103
P07948	0.0002102
P50616	0.0002098
P20248	0.0002098
P10275	0.0002095
P11308	0.0002095
P11021	0.0002093
P21333	0.000209
P53350	0.0002088
Q96ST3	0.0002087
Q8N2W9	0.0002087
Q9BY11	0.0002086
Q92870	0.0002085
P08238	0.0002084
P35269	0.0002081
P62899	0.0002081
Q00987	0.0002081
Q00613	0.0002081
P09429	0.0002081
P28360	0.0002081
Q15545	0.0002081
Q15544	0.0002081
Q15543	0.0002081
Q15542	0.0002081
P17480	0.0002081
P05412	0.0002081
Q16548	0.0002081
Q5H9L4	0.0002081
P52655	0.0002081
Q16514	0.0002081
Q6P1X5	0.0002081
Q92804	0.0002081
P29083	0.0002081
P49848	0.0002081
P01100	0.0002081
P26367	0.0002081
P53999	0.0002081
Q12962	0.0002081
P46821	0.000208
P56537	0.0002079
O60739	0.0002079
Q9Y385	0.0002076
P68036	0.0002076
P49639	0.000207
Q8NFJ9	0.0002067
P46109	0.0002063
Q99497	0.0002061
Q15835	0.000206
P19419	0.000206
P43250	0.000206
P34947	0.000206
P63165	0.000206
Q9H0R8	0.0002059
P21796	0.0002059
O43255	0.0002059
P45880	0.0002059
Q9NRR8	0.0002059
Q92876	0.0002059
O14656	0.0002059
O14613	0.0002059
Q07812	0.0002059
Q10567	0.0002059
O94811	0.0002059
P99999	0.0002059
P07101	0.0002059
Q15019	0.0002059
O75914	0.0002059
P27361	0.0002059
Q8IUQ4	0.0002059
O95139	0.0002059
Q9UKI2	0.0002059
Q14814	0.0002059
Q9BXS0	0.0002059
Q08495	0.0002059
Q00610	0.0002059
Q13393	0.0002059
P41252	0.0002059
P00414	0.0002059
Q02156	0.0002059
Q92934	0.0002059
Q8N5U6	0.0002059
P25098	0.0002059
P51784	0.0002059
P62330	0.0002058
P20265	0.0002057
Q99967	0.0002057
Q13952	0.0002057
Q59EC8	0.0002057
Q5VWG9	0.0002057
P55317	0.0002057
Q01658	0.0002057
P28347	0.0002057
O43379	0.0002057
P09086	0.0002057
P23193	0.0002057
P52657	0.0002057
Q16533	0.0002057
P36508	0.0002057
Q9Y6X2	0.0002057
P17535	0.0002057
P61978	0.0002057
P29084	0.0002057
Q13887	0.0002057
P01574	0.0002057
P23760	0.0002057
Q04864	0.0002057
Q14919	0.0002057
P29375	0.0002057
Q8IYA7	0.0002057
Q9P0U4	0.0002057
Q01892	0.0002057
P20749	0.0002057
Q15035	0.0002057
Q00403	0.0002057
P04150	0.0002057
P78317	0.0002057
Q9UKN8	0.0002057
P18848	0.0002057
O15446	0.0002057
P35998	0.0002057
Q03060	0.0002057
Q13487	0.0002057
P25208	0.0002057
Q9H5J8	0.0002057
Q15650	0.0002057
Q9Y5Q9	0.0002057
Q9Y5Q8	0.0002057
Q9UNN4	0.0002057
Q96A83	0.0002057
O75629	0.0002057
Q13422	0.0002057
Q13765	0.0002057
Q53T94	0.0002057
Q9HAW0	0.0002057
Q01105	0.0002057
Q02548	0.0002057
P49736	0.0002057
O75155	0.0002057
Q12947	0.0002057
P13984	0.0002057
Q9BUI4	0.0002057
Q5SXM2	0.0002057
Q9Y265	0.0002057
Q9Y261	0.0002057
Q9Y230	0.0002057
Q8WUA4	0.0002057
P45973	0.0002057
Q15573	0.0002057
Q15572	0.0002057
Q8IZX4	0.0002057
O75925	0.0002057
Q9H1D9	0.0002057
P35869	0.0002057
Q92994	0.0002057
O14981	0.0002057
Q969F0	0.0002057
Q9NYV6	0.0002057
P14859	0.0002057
P10914	0.0002057
P06239	0.0002055
P12931	0.0002055
O15264	0.0002055
Q16623	0.0002053
P63279	0.0002052
P67809	0.0002051
Q9UNZ2	0.0002049
Q9NV58	0.0002044
P40763	0.0002043
Q96RT1	0.0002043
Q6S5L8	0.0002043
Q8WU20	0.0002043
Q9NSE2	0.0002043
O14796	0.0002043
Q71V34	0.0002043
Q99952	0.0002043
P15941	0.0002043
Q6PKX4	0.0002043
O75368	0.0002043
Q7Z6G8	0.0002043
P04439	0.0002043
P16070	0.0002043
Q9NP31	0.0002043
O14492	0.0002043
Q06124	0.0002043
Q92569	0.0002043
Q9H6Q3	0.0002043
Q05397	0.0002043
O14654	0.0002043
P42224	0.0002043
Q92529	0.0002043
Q07889	0.0002043
Q13239	0.0002043
Q9Y6R0	0.0002043
Q16827	0.0002043
P23471	0.0002043
P23470	0.0002043
P23467	0.0002043
O15524	0.0002043
P23458	0.0002043
O95704	0.0002043
P51813	0.0002043
P15882	0.0002043
O75791	0.0002043
P35070	0.0002043
P29353	0.0002043
Q68CZ2	0.0002043
Q63HR2	0.0002043
P01135	0.0002043
O75553	0.0002043
P21860	0.0002043
Q9UKW4	0.0002043
P01133	0.0002043
Q8WYP3	0.0002043
Q7KZ85	0.0002043
P51451	0.0002043
P78314	0.0002043
Q08881	0.0002043
Q13153	0.0002043
Q15303	0.0002043
P16591	0.0002043
Q5TCU5	0.0002043
P15498	0.0002043
Q05209	0.0002043
Q99102	0.0002043
P27701	0.0002043
Q02297	0.0002043
P08648	0.0002043
Q9UQQ2	0.0002043
P01011	0.0002043
Q9H299	0.0002043
Q8WV28	0.0002043
O60496	0.0002043
Q99704	0.0002043
P14625	0.0002043
Q96D37	0.0002043
Q9BRG2	0.0002043
P46108	0.0002043
Q8TEW6	0.0002043
Q9UQC2	0.0002043
Q12913	0.0002043
P35240	0.0002043
Q7Z7G1	0.0002043
Q15262	0.0002043
P35568	0.0002043
P40189	0.0002043
Q9UJM3	0.0002043
P16144	0.0002043
O00443	0.0002043
O00459	0.0002043
Q13387	0.0002043
P42684	0.0002043
P42681	0.0002043
P42680	0.0002043
P42679	0.0002043
P08575	0.0002043
P52735	0.0002043
Q92625	0.0002043
Q5TEW3	0.0002043
O43639	0.0002043
Q13671	0.0002043
P98077	0.0002043
P15309	0.0002043
Q6ZV89	0.0002043
O00750	0.0002043
Q99650	0.0002043
Q9BXW9	0.0002042
Q99728	0.0002042
Q14194	0.0002037
P00747	0.0002034
P30480	0.000203
P13569	0.0002029
P46527	0.0002027
Q06481	0.0002025
Q96RK4	0.0002023
P20340	0.0002023
P52564	0.0002023
Q15436	0.0002023
O94833	0.0002023
P18669	0.0002023
Q96KM6	0.0002023
Q92834	0.0002023
Q99551	0.0002023
Q9NRI5	0.0002023
P42025	0.0002023
P61163	0.0002023
Q7L1Q6	0.0002023
Q8TD16	0.0002023
P43360	0.0002023
P30622	0.0002023
O15020	0.0002023
Q9Y2Q3	0.0002023
Q15691	0.0002023
Q9H8T0	0.0002023
P42575	0.0002023
Q14204	0.0002023
P27695	0.0002023
O14593	0.0002023
O60244	0.0002023
P11171	0.0002023
P43034	0.0002023
Q53G35	0.0002023
P46734	0.0002023
Q96G01	0.0002023
O75935	0.0002023
Q9UPT6	0.0002023
P52732	0.0002023
O76071	0.0002023
O94855	0.0002023
Q13409	0.0002023
Q9NW64	0.000202
Q9H4B4	0.000202
Q13642	0.000202
Q92913	0.000202
Q969D9	0.000202
O43781	0.000202
Q6ZUS6	0.000202
Q12860	0.000202
Q9H0S4	0.000202
P46695	0.000202
Q9ULX3	0.000202
Q8TAI1	0.000202
Q9BWG6	0.000202
Q14011	0.000202
Q9Y3Q8	0.000202
P61964	0.000202
P09543	0.000202
Q15776	0.000202
Q9UIF8	0.000202
O75077	0.000202
Q8NDX6	0.000202
Q9HCC9	0.000202
Q14982	0.000202
Q96NN9	0.000202
Q9BT17	0.000202
P67870	0.000202
O43414	0.000202
Q9H9D4	0.000202
P29372	0.000202
Q9BSJ6	0.000202
P31948	0.000202
Q08E93	0.000202
Q8IV54	0.000202
Q9UL18	0.000202
P62945	0.000202
A0JLT2	0.000202
P32004	0.000202
P07237	0.000202
Q13449	0.000202
Q14515	0.000202
Q8ND30	0.000202
Q9BRP8	0.000202
Q96Q45	0.000202
Q9NX24	0.000202
P13591	0.000202
Q96A00	0.000202
Q9BRJ6	0.000202
Q9P013	0.000202
Q969X6	0.000202
Q05193	0.000202
O15394	0.000202
Q86Y79	0.000202
Q15223	0.000202
P51693	0.000202
Q5VU43	0.000202
Q16653	0.000202
P20916	0.000202
Q96LT9	0.000202
P07498	0.000202
Q15527	0.000202
P10809	0.000202
P42658	0.000202
P25788	0.000202
P25685	0.0002019
P07947	0.0002018
Q92797	0.0002017
Q9BVA6	0.0002017
Q13127	0.0002017
Q15642	0.0002017
O95163	0.0002017
Q8IUH5	0.0002017
O75146	0.0002017
Q9NX55	0.0002017
P12270	0.0002017
Q6NWY9	0.0002017
Q96D09	0.0002017
P12956	0.0002017
O75446	0.0002017
Q13011	0.0002017
P04406	0.0002017
P23610	0.0002017
Q9P2H0	0.0002017
Q8IZQ1	0.0002017
O94973	0.0002017
Q99689	0.0002017
P61086	0.0002017
Q12873	0.0002017
Q99963	0.0002017
Q02779	0.0002017
Q9ULX6	0.0002017
P43357	0.0002017
Q15119	0.0002017
O75409	0.0002017
O00291	0.0002017
Q13562	0.0002017
P35520	0.0002017
O14776	0.0002017
Q9Y3C7	0.0002017
Q9BYW2	0.0002017
O75400	0.0002017
Q9BVJ6	0.0002017
Q9Y2X7	0.0002017
P35080	0.0002017
Q9Y371	0.0002017
P21980	0.0002017
O43312	0.0002017
P09012	0.0002013
P14678	0.0002013
Q9UHI6	0.0002013
Q8WUM5	0.0002013
O43464	0.000201
P27824	0.0002009
P32121	0.0002009
Q15796	0.0002007
Q05513	0.0001992
P17612	0.0001992
Q9NQB0	0.0001992
Q04721	0.0001992
Q9UQB3	0.0001992
Q9NZJ7	0.0001992
P56817	0.0001992
Q9UMX0	0.0001992
P52799	0.0001992
P49755	0.0001992
Q6PIL6	0.0001992
P14136	0.0001992
O43187	0.0001992
O00548	0.0001992
Q9UMF0	0.0001992
Q9NZ42	0.0001992
P62491	0.0001992
Q02410	0.0001992
Q8IZD9	0.0001992
Q96BI3	0.0001992
P46531	0.0001992
Q9UM47	0.0001992
O75369	0.0001992
Q92542	0.0001992
Q99590	0.0001992
Q99569	0.0001992
Q6P1Q9	0.0001992
Q8WW43	0.0001992
Q99828	0.0001992
O95645	0.0001992
P49810	0.0001992
Q86W91	0.0001992
Q53TM5	0.0001992
O75460	0.0001992
Q9Y2W7	0.0001992
Q15363	0.0001992
P31150	0.0001992
Q4W5T8	0.0001992
Q96TA2	0.0001992
Q6LCG8	0.0001992
Q99466	0.0001992
O15503	0.0001989
Q9UK80	0.0001984
Q59EM9	0.0001984
Q04695	0.0001984
Q15843	0.0001984
P19013	0.0001984
Q49A88	0.0001984
P83916	0.0001984
Q9UKE5	0.0001984
Q9H1Y0	0.0001984
Q9Y618	0.0001983
O94941	0.0001981
O95155	0.0001981
Q9P0W5	0.0001981
P14784	0.0001981
Q9UKV5	0.0001981
Q9UNN5	0.0001981
Q96JH7	0.0001981
Q99759	0.0001981
P04234	0.0001981
Q96CS3	0.0001981
Q6EEV6	0.0001981
Q9BUN8	0.0001981
P54252	0.0001981
P25963	0.0001981
Q14191	0.0001981
Q9P2S5	0.0001981
Q9Y244	0.0001981
O00221	0.0001981
O00237	0.0001981
Q14139	0.0001981
Q16665	0.0001981
P20618	0.0001981
O94888	0.0001981
O75688	0.0001981
Q14CS0	0.0001981
Q04323	0.0001981
Q96LJ8	0.0001981
P62191	0.0001981
Q13617	0.0001981
Q8TAT6	0.0001981
Q9BQE4	0.0001981
Q9BZV1	0.0001981
P41180	0.0001981
O94868	0.0001981
Q9H0K1	0.0001981
Q92597	0.0001981
P28074	0.0001981
Q8NHG7	0.0001981
Q86TM6	0.0001981
Q92575	0.0001981
Q92890	0.0001981
O00124	0.0001981
Q15785	0.0001981
Q9H9S3	0.0001981
P20823	0.0001981
Q9BZE9	0.0001981
Q6GYA4	0.0001981
P01889	0.0001981
P42566	0.0001974
P84022	0.0001974
O75554	0.0001973
Q99959	0.0001973
P82979	0.0001973
P26599	0.0001973
Q9Y446	0.0001973
Q15428	0.0001973
Q9UBW7	0.0001973
Q99873	0.0001973
Q8IYB3	0.0001973
P61244	0.0001973
P52565	0.0001973
O15399	0.0001973
Q05586	0.0001973
Q15637	0.0001973
O15479	0.0001973
Q9NX58	0.0001973
Q9UKA9	0.0001973
Q01130	0.0001973
Q9HAU4	0.0001973
O75494	0.0001973
Q96PK6	0.0001973
Q96FW1	0.0001973
Q08170	0.0001973
P10827	0.0001973
Q15853	0.0001973
P24385	0.0001972
Q13315	0.0001971
Q13309	0.0001971
O60566	0.0001971
P54278	0.0001971
P54277	0.0001971
Q9P287	0.0001971
P46736	0.0001971
P60896	0.0001971
Q8N1V2	0.0001971
P15927	0.0001971
Q92831	0.0001971
Q13535	0.0001971
Q9NXR7	0.0001971
Q9P0W2	0.0001971
P42229	0.0001971
P54725	0.0001971
O94776	0.0001971
P24941	0.0001971
Q14565	0.0001971
Q7Z589	0.0001971
Q96GD4	0.0001971
Q06609	0.0001971
Q9HB96	0.0001971
O15287	0.0001971
Q86YC2	0.0001971
P27694	0.0001971
P28799	0.000197
Q7L5N1	0.0001969
Q7Z6E9	0.0001969
P46934	0.0001961
Q9BXM7	0.000196
Q15388	0.0001959
Q16695	0.0001958
P23258	0.0001958
P25789	0.0001958
P25786	0.0001958
P68402	0.0001958
Q96C32	0.0001958
Q9NRX3	0.0001958
O14933	0.0001958
O14867	0.0001958
Q5U5U6	0.0001958
Q13224	0.0001958
Q9BT88	0.0001958
O60671	0.0001958
P31689	0.0001958
O14936	0.0001958
P78396	0.0001958
P53667	0.0001958
O14818	0.0001958
Q13155	0.0001958
Q8WVB3	0.0001958
P57075	0.0001958
P60763	0.0001958
Q15645	0.0001958
O15354	0.0001958
Q86YM7	0.0001958
P49796	0.0001958
P49792	0.0001958
P63000	0.0001958
Q99719	0.0001958
P62253	0.0001958
Q12959	0.0001958
Q8TF42	0.0001958
Q14190	0.0001958
Q16342	0.0001958
Q9H4P4	0.0001958
P41220	0.0001958
Q5VTD9	0.0001955
Q13867	0.0001952
Q15287	0.0001952
Q9Y3I1	0.0001943
Q9BQ83	0.0001919
P04908	0.0001919
Q92882	0.0001919
O15116	0.0001919
O00186	0.0001919
O14893	0.0001919
Q92841	0.0001919
Q9Y3F4	0.0001919
Q96HA8	0.0001919
P08621	0.0001919
Q9NY12	0.0001919
P57678	0.0001919
P09661	0.0001919
O60383	0.0001919
O75817	0.0001919
P62316	0.0001919
P09382	0.0001919
O95149	0.0001919
O60506	0.0001919
Q13432	0.0001919
P62314	0.0001919
P83369	0.0001919
Q9Y2W1	0.0001919
Q96AE4	0.0001919
P62312	0.0001919
Q9Y333	0.0001919
Q00839	0.0001919
Q9NWZ8	0.0001919
Q14974	0.0001919
Q53GF4	0.0001919
Q96PV6	0.0001919
P31943	0.0001919
Q5JVS0	0.0001919
Q15233	0.0001919
P38432	0.0001919
Q5T3J3	0.0001919
P62308	0.0001919
P08579	0.0001919
P62306	0.0001919
Q9UK45	0.0001919
P62310	0.0001919
Q8TEQ6	0.0001919
Q9Y4Z0	0.0001919
Q9Y4Y9	0.0001919
Q9NWA0	0.0001919
P22087	0.0001919
Q9H840	0.0001919
Q8WXD5	0.0001919
O95218	0.0001919
P22626	0.0001919
O00567	0.0001919
P27105	0.0001919
Q5UIP0	0.0001919
O95402	0.0001919
Q9BQG0	0.0001919
Q01085	0.0001919
O43390	0.0001919
P60510	0.0001919
P62304	0.0001919
P62318	0.0001919
P31942	0.0001919
P84090	0.0001919
Q9Y294	0.0001905
Q96QT4	0.0001905
P28749	0.0001905
Q9NVP2	0.0001905
Q9HCU9	0.0001905
Q08999	0.0001905
Q01844	0.0001905
P48552	0.0001904
P21283	0.0001904
P28069	0.0001904
O75448	0.0001904
Q16236	0.0001904
Q9HCK8	0.0001904
Q9H0E9	0.0001904
Q15466	0.0001904
Q5VT06	0.0001904
P51532	0.0001904
P21579	0.0001904
P51843	0.0001904
P35228	0.0001904
Q12778	0.0001904
P48443	0.0001904
Q12756	0.0001904
Q6STE5	0.0001904
Q9UBK2	0.0001904
O15379	0.0001904
Q92956	0.0001904
Q9BYK8	0.0001904
A5YKK6	0.0001904
P17096	0.0001904
O95257	0.0001904
O60337	0.0001904
Q15648	0.0001904
Q99460	0.0001904
O95425	0.0001904
P16949	0.0001904
Q13772	0.0001904
Q3V6T2	0.0001904
Q9BUJ2	0.0001904
Q15596	0.0001904
O95819	0.0001904
P07148	0.0001904
O75293	0.0001904
Q9BYM8	0.0001899
Q9Y5U2	0.0001899
Q9H2C0	0.0001899
Q96PU5	0.0001899
O75069	0.0001899
Q9Y297	0.0001899
Q5VTR2	0.0001899
Q86Y13	0.0001899
O14964	0.0001899
P12273	0.0001899
Q92598	0.0001899
Q13275	0.0001899
P22681	0.0001899
P63146	0.0001899
P54259	0.0001891
P07858	0.0001872
P61769	0.0001841
Q13510	0.000184
Q14444	0.0001838
P06729	0.0001838
P09234	0.0001838
Q14240	0.0001838
Q7Z627	0.0001838
Q9UKV8	0.0001838
Q9Y2W2	0.0001838
Q9NTZ6	0.0001838
Q7Z591	0.0001838
P26368	0.0001838
P11940	0.0001838
O94906	0.0001838
P63162	0.0001838
Q6P2Q9	0.0001838
P51114	0.0001838
Q9UPQ9	0.0001838
Q8WU68	0.0001838
Q13283	0.0001838
P02760	0.0001836
Q9UKR3	0.0001836
Q9Y337	0.0001836
Q9UHI8	0.0001836
P09466	0.0001836
P14091	0.0001836
P07288	0.0001836
P61812	0.0001836
P04278	0.0001836
Q9UNI1	0.0001836
P17931	0.0001836
Q8IXA5	0.0001836
Q96IY4	0.0001836
P09038	0.0001836
Q15582	0.0001836
P08253	0.0001836
P60953	0.0001836
P04180	0.0001836
Q07954	0.0001836
P55040	0.0001836
P05231	0.0001836
Q99972	0.0001836
P10145	0.0001836
P01138	0.0001836
P01137	0.0001836
P01127	0.0001836
P60568	0.0001836
P41159	0.0001836
P08133	0.0001836
P61626	0.0001836
O00214	0.0001836
O00193	0.0001836
P04085	0.0001836
P05112	0.0001836
P20151	0.0001836
P22301	0.0001836
O00182	0.0001836
Q9H013	0.0001836
P12544	0.0001836
P12036	0.0001835
P00749	0.0001817
Q9NP95	0.0001809
Q9NX70	0.0001802
Q5VWX1	0.0001802
Q9BTT4	0.0001802
P09651	0.0001802
Q01780	0.0001802
Q9H0D6	0.0001802
Q9UKY1	0.0001802
Q15047	0.0001802
O43294	0.0001785
P14416	0.0001785
P63244	0.0001785
Q13424	0.0001785
Q9Y6I3	0.0001785
Q96Q42	0.000177
Q14152	0.0001767
P12814	0.0001767
O95292	0.0001766
P14652	0.0001765
Q76N89	0.0001765
P51571	0.0001765
P29692	0.0001765
O14618	0.0001765
Q15046	0.0001765
Q08209	0.0001765
P07197	0.0001761
P16220	0.0001759
P19404	0.0001752
Q13490	0.0001736
Q9BTT0	0.0001734
Q9NZ45	0.0001734
P10276	0.0001734
P49918	0.0001734
Q9NP64	0.0001734
Q5H9L2	0.0001734
Q9UIG0	0.0001734
P10109	0.0001734
P51814	0.0001734
O43920	0.0001734
P10826	0.0001734
P78347	0.0001734
O60313	0.0001734
P62826	0.0001734
Q8IX01	0.0001734
Q16595	0.0001733
Q9UQN3	0.0001731
Q96BT3	0.000172
P08631	0.0001716
Q9UGJ0	0.0001716
Q9UKS6	0.0001716
Q14244	0.0001716
Q96J02	0.0001716
Q9UNF0	0.0001716
Q13438	0.0001716
Q53G59	0.0001687
P48549	0.0001687
P48544	0.0001687
P14867	0.0001687
Q96NY7	0.0001687
Q92806	0.0001687
Q30201	0.0001679
Q9HCE7	0.0001669
Q547Q3	0.0001669
Q13485	0.0001669
Q8NDD8	0.0001669
P30154	0.0001653
Q5THR3	0.0001653
Q9UBT2	0.0001653
Q9UER7	0.0001653
O94966	0.0001653
Q9NWV8	0.0001653
P30153	0.0001653
Q6MZP7	0.0001653
O75928	0.0001653
Q96GY3	0.0001653
Q8IY92	0.0001653
Q12933	0.0001651
Q92673	0.0001635
Q6ZW49	0.0001623
Q9P0J0	0.0001621
Q9NR28	0.0001621
Q9NR09	0.0001621
Q13489	0.0001621
P98170	0.0001621
Q9NWQ8	0.0001621
Q96CA5	0.0001621
O95835	0.0001621
Q93009	0.0001621
P05814	0.0001621
P47710	0.0001621
Q15121	0.0001621
Q16539	0.0001621
Q8WXH2	0.0001598
Q9UJY4	0.0001596
P08246	0.0001594
P17735	0.0001594
P52790	0.0001594
O15198	0.0001594
Q96RU7	0.0001594
P03973	0.0001594
O60563	0.0001594
P50750	0.0001594
O95985	0.0001594
P80370	0.0001594
Q96AQ9	0.0001594
P98160	0.0001594
Q9NTG7	0.0001594
Q9GZQ8	0.0001588
Q14457	0.0001588
Q6FI68	0.0001583
P47914	0.0001583
Q8WVZ9	0.0001583
O75962	0.0001583
P62913	0.0001583
Q70EK8	0.0001583
Q8NC44	0.0001583
P49427	0.0001577
P63208	0.0001577
Q00534	0.0001577
Q92530	0.0001577
Q99607	0.0001577
P62877	0.0001577
P30281	0.0001577
P62837	0.0001577
P13639	0.0001552
Q9BX84	0.0001552
Q00722	0.0001552
P02686	0.0001552
P35580	0.0001552
Q7Z406	0.0001552
P04083	0.0001552
P35579	0.0001552
Q01970	0.0001552
Q9NQ66	0.0001552
P05164	0.000151
P07196	0.0001505
P07093	0.0001493
P05121	0.0001493
P05120	0.0001493
Q03405	0.0001493
P00734	0.0001493
Q9Y5Y6	0.0001493
P11717	0.0001493
P08697	0.0001493
P98164	0.0001493
P35237	0.0001493
P00750	0.0001493
P14210	0.0001493
P14543	0.0001493
P07711	0.0001493
P48039	0.0001458
P63027	0.0001458
Q9P0L0	0.0001458
Q9Y2K6	0.0001458
Q96SU4	0.0001458
P32856	0.0001458
P23763	0.0001458
Q12846	0.0001458
P61266	0.0001458
O75306	0.0001448
Q9HB58	0.0001448
Q92993	0.0001448
O43678	0.0001448
O75489	0.0001448
Q16795	0.0001448
O75439	0.0001435
Q9C005	0.0001434
P36542	0.0001434
Q70EL1	0.0001434
P49454	0.0001434
P40818	0.0001434
Q9Y3E7	0.0001434
O43175	0.0001434
Q8ND90	0.0001434
Q96EH3	0.0001434
P22736	0.0001434
Q14697	0.0001424
Q9Y478	0.0001424
O43741	0.0001424
Q9H492	0.0001424
Q02790	0.0001424
P08243	0.0001424
P26639	0.0001424
P49915	0.0001424
P00558	0.0001424
Q13131	0.0001424
P54646	0.0001424
Q504X9	0.0001424
P54619	0.0001424
P02787	0.00014
Q9UP52	0.0001398
P02786	0.0001398
P30533	0.0001367
P09958	0.0001367
Q9UJY5	0.0001367
Q02962	0.0001359
O60356	0.0001359
O15550	0.0001359
P29590	0.0001359
O15162	0.0001359
Q96BR9	0.0001359
Q9BTK6	0.0001359
Q12888	0.0001359
P20585	0.0001359
P21810	0.0001341
Q9Y6E0	0.0001341
P00450	0.0001281
Q7Z333	0.00012
Q04656	0.0001111
P02768	0.0001049
Q9H5V8	0.0001049
P02647	0.0001049
P35754	9.81e-05
O00244	9.81e-05
Q5EBL8	9.81e-05

## Sheet: ShortestBN
UniprotID	Betweeness
P04626	138807
P20226	124956
P04156	112084
P37840	91931.3
Q16637	89120.9
P55072	84506.5
P62993	83655.6
P10636	78425.9
P42858	77523.2
P49768	67333.1
O60260	62325.7
P01023	62196.9
P37231	58762.3
Q14203	55777.5
P51587	51505.6
P62988	49875.5
P35637	46745.8
Q6Y7W6	38551.4
P05067	37130.1
P09936	29961.1
P43354	27986.7			Shortest path betweeness
P04637	27759
P22314	26466.2
P21675	25797.1
P00441	20109.2
O43464	18797
P28799	18231.4
P00749	16900.5
Q99497	15774.3
Q9UGJ0	15625.9
P49841	15415.3
P40337	15320.8
P19174	13154.9
P02649	12904.2
Q13148	12703.2
P46821	12449.6
Q15796	12419.7
Q9UQN3	12198.3
Q96QT4	12154.5
P42574	12030
Q15653	11766.9
P63104	11758.4
P03372	11562.1
P28702	11411.6
Q9Y3I1	11007.7
O95292	10784.5
Q6ZW49	10728
Q9H3D4	10514.3
P11021	10411.6
Q15717	10334.6
P19793	9509.75
P46379	9489.74
P62258	9255.05
Q13867	9162.03
P24928	9110.06
Q9HBA0	9079.16
P63279	8986.09
Q01959	8831.07
P11308	8611.32
P13569	8385.6
Q30201	8382.99
P07437	8349.73
P22695	8226.41
P01106	8202.42
Q9UNE7	8192.42
P01584	7864.92
P10415	7640.05
P21917	7263.1
P19404	7246.17
Q13510	7146
P35222	6991.5
P00533	6597.27
Q13190	6567.58
P29466	6271.99
P00747	6255.95
Q13616	6188.48
P78352	6075.34
P68400	6012.64
P62380	6006.08
P05164	5960
P23246	5500.8
P46109	5209.96
Q92870	5155.46
O00213	4934.4
Q03135	4934.4
P49639	4912.78
P02787	4772
P00450	4772
Q9ULW3	4591.11
P16333	4578.16
Q16623	4561.06
Q15418	4289.45
Q14152	4253.29
P54257	4190.06
Q92673	3746.53
P10275	3723.94
Q7Z333	3585
Q04656	3585
P84022	3582
P07900	3533.78
Q14194	3513.93
P06241	3477.45
P51784	3354.82
P00519	3317.76
P55212	3263.75
P07858	3077.2
Q9UBN7	3056.63
Q08211	3019.37
Q5VTD9	2923.84
Q9UQF2	2889.21
Q15287	2878.88
P11142	2850.88
P28482	2770.35
Q9NRD5	2742.45
Q16695	2667.48
Q92793	2581.61
O15503	2518.65
Q9Y4K3	2406.2
P46527	2391.32
Q9BXM7	2391
Q8WXH2	2391
P08238	2367.46
O94985	2356.12
Q16594	2326.75
P18206	2316.07
P54259	2207.73
Q92905	2186.45
P24385	2156.68
P38398	2062.49
P09769	2004.67
Q14289	2004.67
P43405	2004.67
P20936	2001.84
P63165	1909.61
Q04206	1865.96
P61769	1746.72
Q8NFJ9	1718.95
Q13322	1634.88
Q9Y2R2	1629.26
O60674	1629.26
P26045	1629.26
P45983	1599.07
P12036	1552.95
Q9BY11	1538.6
Q96L34	1510.78
Q9NPF8	1473.55
Q53QZ3	1473.55
P19784	1473.55
Q96A73	1473.55
Q16143	1472.14
O60869	1404.44
P06400	1404.44
Q09472	1376.74
P56524	1376.74
P06493	1371.14
Q8IVM0	1320.37
Q16595	1301.22
Q15011	1293.69
Q9NV58	1261.67
P12830	1246.3
P35221	1246.3
P14923	1246.3
P27986	1246.3
P21333	1226.41
P31946	1218.36
Q01082	1215.66
P08670	1215.66
A0JLT2	1192.72
O96017	1183.95
Q96ST3	1156.93
Q8N2W9	1156.93
P53350	1153.84
Q9Y490	1132.39
O75815	1132.39
Q14451	1132.39
P24864	1104.43
P31749	1100.68
P17947	1085.42
Q12933	1066.71
Q7L5N1	1026.07
Q7Z6E9	1026.07
P50616	986.755
P20248	908.298
P34932	899.018
P25054	895.953
Q12906	895.953
P25685	893.219
P16885	884.546
Q07817	884.052
O60716	884.052
P62158	866.637
Q15788	856.697
Q14686	856.697
Q9Y6Q9	856.697
Q92956	749.444
P67809	738.929
Q9Y618	738.02
Q96CV9	686.657
O75376	686.657
Q16512	671.627
P61764	671.627
P07947	659.188
Q9UNZ2	632.425
Q96S59	620.059
Q14790	599.073
Q969H0	599.073
Q00535	599.073
P13473	596.076
O00141	591.974
P67775	591.974
Q13490	573.345
P56537	546.975
O60739	546.975
Q06481	532.331
P49662	524.141
P55210	524.141
Q14164	521.616
P23508	521.616
P06239	497.181
P12931	497.181
O15264	481.424
Q9UJY4	456.028
O00268	451.392
P30480	415.837
P07948	389.371
P62330	376.857
P12814	376.023
P27824	363.658
P32121	363.658
Q9Y385	355.785
P68036	355.785
Q9BXW9	313.091
Q99728	313.091
Q96Q42	228.59
P07197	220.92
P16220	204.23
P42566	201.506
P46934	168.283
P08107	59.2671
O43236	59.2671
P08246	0
P23258	0
Q9NW64	0
Q96RK4	0
O94941	0
P25789	0
P25786	0
P40763	0
Q05513	0
P17612	0
Q9Y294	0
Q96RT1	0
Q6S5L8	0
P07093	0
Q9BQ83	0
P20265	0
Q8WU20	0
O75306	0
Q92797	0
Q6FI68	0
P35269	0
P48552	0
P68402	0
P14652	0
Q9BVA6	0
Q9NSE2	0
P04908	0
Q99967	0
Q9H4B4	0
Q9BTT0	0
Q13952	0
O14796	0
Q59EC8	0
Q71V34	0
O75554	0
Q9NQB0	0
Q99952	0
Q5VWG9	0
O43294	0
Q9UK80	0
P62899	0
Q92882	0
O95155	0
Q13642	0
Q9HB58	0
P20340	0
O15116	0
Q13127	0
Q9H0R8	0
Q92913	0
Q9BYM8	0
P02760	0
Q969D9	0
O00186	0
P15941	0
Q9UKR3	0
P60709	0
Q00987	0
Q9HCE7	0
P21283	0
P52564	0
Q04721	0
Q9NZ45	0
Q15642	0
P21796	0
P55317	0
Q00613	0
P09429	0
Q9P0W5	0
O43781	0
Q13315	0
P28069	0
Q9Y337	0
O95163	0
O14893	0
P13639	0
Q02962	0
P14784	0
Q92841	0
Q8IUH5	0
Q13309	0
Q6ZUS6	0
Q9UHI8	0
Q99959	0
P09466	0
Q14444	0
Q9NX70	0
P14091	0
P28360	0
Q9BX84	0
Q01658	0
Q04917	0
O75146	0
P07288	0
P28749	0
P48039	0
Q12860	0
O60566	0
P17735	0
O75448	0
Q6PKX4	0
O75368	0
Q15436	0
O43255	0
Q9H0S4	0
P28347	0
O43379	0
Q96C32	0
Q9NX55	0
O60356	0
P82979	0
Q547Q3	0
Q9UQM7	0
Q7Z6G8	0
P10276	0
P52790	0
P10909	0
Q9Y5U2	0
Q9C005	0
Q15545	0
Q15544	0
Q15543	0
Q15542	0
Q16236	0
Q9UQB3	0
Q9UKV5	0
P26599	0
P09012	0
P30154	0
Q9Y3F4	0
Q9P0J0	0
P14416	0
Q15835	0
Q9NZJ7	0
Q9NR28	0
P04439	0
Q96HA8	0
P47914	0
P46695	0
P36542	0
P16070	0
Q9NP31	0
O94833	0
P17480	0
P05412	0
P54278	0
P61812	0
P54277	0
P49427	0
P18669	0
Q9H2C0	0
P08621	0
Q9NR09	0
P56817	0
O14492	0
Q9UMX0	0
Q96KM6	0
P45880	0
P06729	0
P09086	0
Q9NY12	0
P63027	0
Q9HCK8	0
P05121	0
P05120	0
P49918	0
Q13489	0
P63244	0
Q13424	0
Q9H0E9	0
Q9NP64	0
Q15466	0
Q92834	0
P63208	0
P12270	0
P09234	0
Q06124	0
Q92569	0
Q9H6Q3	0
P57678	0
Q05397	0
Q9ULX3	0
Q16548	0
Q99551	0
Q5H9L4	0
P23193	0
O14654	0
Q5THR3	0
Q96BT3	0
Q9NRI5	0
P52657	0
P52799	0
P52655	0
Q00722	0
Q96PU5	0
Q16533	0
P42224	0
P36508	0
Q9Y6X2	0
Q5VT06	0
P49755	0
Q8TAI1	0
P04278	0
Q6PIL6	0
P17535	0
Q9NRR8	0
P42025	0
Q9P287	0
Q9UNI1	0
P14136	0
P61978	0
Q9NVP2	0
P61163	0
Q59EM9	0
Q16514	0
P51532	0
Q92529	0
Q9NRX3	0
Q8WVZ9	0
Q6NWY9	0
Q03405	0
Q9BWG6	0
Q07889	0
P14678	0
P09661	0
P17931	0
O15198	0
O15428	0
Q04695	0
Q96D09	0
Q92876	0
Q15843	0
Q13239	0
P21579	0
P02768	0
Q9Y446	0
P08631	0
Q92993	0
Q6P1X5	0
Q8TER5	0
O60383	0
Q5H9L2	0
O75817	0
P00734	0
O14656	0
P62316	0
Q14011	0
P98170	0
Q13485	0
P09382	0
Q9NWQ8	0
O14933	0
Q9Y6R0	0
O95149	0
P12956	0
O14867	0
Q16827	0
O60506	0
Q9UBT2	0
P23471	0
Q15428	0
P23470	0
Q96RU7	0
Q13432	0
P68366	0
P51843	0
Q9UNN5	0
P62314	0
Q9Y3Q8	0
P83369	0
P23467	0
Q9Y2W1	0
O15524	0
Q7L1Q6	0
Q9UIG0	0
P23458	0
Q14240	0
O75069	0
O14613	0
P61964	0
Q9P0L0	0
Q96AE4	0
P46736	0
Q8IXA5	0
P02686	0
P35228	0
P09543	0
P62312	0
O95704	0
P19419	0
Q15776	0
O43187	0
O75446	0
Q07812	0
O15550	0
Q9UIF8	0
Q7Z627	0
P10109	0
Q9UBW7	0
P29084	0
Q92804	0
P29083	0
Q96JH7	0
P51813	0
Q13887	0
Q13526	0
Q9HCU9	0
Q5U5U6	0
O75077	0
P29590	0
Q8NDX6	0
Q76N89	0
P01574	0
Q14697	0
Q9HCC9	0
Q12778	0
Q13224	0
O00548	0
Q9BT88	0
Q9Y333	0
P15882	0
Q13501	0
Q9NP95	0
Q00839	0
Q8TD16	0
P60896	0
Q96IY4	0
Q9UHI6	0
P35580	0
Q9Y297	0
P43360	0
P48443	0
Q99759	0
P23760	0
Q9UMF0	0
Q53G59	0
Q8N1V2	0
Q12756	0
Q71U36	0
Q9UER7	0
O15294	0
O60671	0
Q5VWX1	0
Q9Y478	0
Q70EL1	0
Q04864	0
P15927	0
Q9NZ42	0
Q9Y6H5	0
P04234	0
Q9Y5Y6	0
Q14982	0
Q14919	0
Q9Y2K6	0
P09038	0
P51814	0
O43920	0
Q6STE5	0
Q9UBK2	0
Q10567	0
P10826	0
Q13011	0
O94811	0
O15162	0
Q9NWZ8	0
Q14974	0
P11717	0
P29375	0
Q99873	0
Q96NN9	0
O75791	0
Q00534	0
Q13363	0
P19013	0
P31689	0
Q96CS3	0
Q9BT17	0
Q6EEV6	0
P67870	0
P30622	0
Q9BUN8	0
P49848	0
P35070	0
P29353	0
Q53GF4	0
O15020	0
P04406	0
P23610	0
Q49A88	0
Q68CZ2	0
Q92831	0
Q9P2H0	0
Q92530	0
P62491	0
Q02410	0
Q8IYA7	0
Q15582	0
Q9P0U4	0
Q9UKS6	0
P99999	0
O43414	0
P07101	0
Q9Y2Q3	0
Q9UP52	0
Q15691	0
Q9GZQ8	0
P08253	0
Q8IZD9	0
O15379	0
Q9H8T0	0
Q96PV6	0
P42575	0
Q63HR2	0
P01135	0
Q01892	0
P08697	0
O75582	0
Q9UKV8	0
O75553	0
Q13535	0
Q8IZQ1	0
P21860	0
O14936	0
O43741	0
P03973	0
O94973	0
Q99689	0
P31943	0
Q9Y2W2	0
Q9UKW4	0
Q9H9D4	0
Q08999	0
P54252	0
P29372	0
Q5VTR2	0
P01133	0
Q9BSJ6	0
Q8WYP3	0
Q9BTT4	0
Q8IYB3	0
Q99607	0
Q9NXR7	0
Q5JVS0	0
P20749	0
Q15035	0
Q14204	0
Q96SU4	0
P01100	0
Q86Y13	0
P25963	0
Q15388	0
Q00403	0
P11277	0
P43250	0
Q14244	0
Q14191	0
Q9H492	0
Q9NTZ6	0
Q96BI3	0
P04150	0
P31948	0
P30533	0
Q15233	0
Q15019	0
P61244	0
O75962	0
Q9BYK8	0
Q9P2S5	0
P26367	0
O75914	0
P38432	0
Q5T3J3	0
Q9Y244	0
P34947	0
Q96CA5	0
O94966	0
P60953	0
Q02790	0
P27361	0
P32856	0
Q8IUQ4	0
O00221	0
P61086	0
Q7Z406	0
P04180	0
Q12873	0
Q7KZ85	0
P09651	0
P98164	0
P53999	0
Q07954	0
O00237	0
P46531	0
Q9H5V8	0
Q99963	0
P78396	0
Q08E93	0
P51451	0
Q9UM47	0
P78314	0
P78317	0
P51571	0
Q9P0W2	0
O95139	0
Q14139	0
Q08881	0
Q9UKN8	0
Q13153	0
Q8NDD8	0
Q16665	0
P18848	0
A5YKK6	0
P20618	0
P21810	0
P27695	0
Q96BR9	0
Q8IV54	0
P04271	0
P17096	0
O15446	0
O94888	0
P08243	0
Q02779	0
P52565	0
P55040	0
P05231	0
O75369	0
Q7Z591	0
P78347	0
Q8WUM5	0
O95257	0
O14593	0
Q15303	0
O60244	0
P16591	0
Q5TCU5	0
O60563	0
P35998	0
Q03060	0
P62308	0
P53667	0
Q92542	0
Q01780	0
O60337	0
P50750	0
Q15172	0
P04083	0
Q13487	0
P25208	0
Q9H5J8	0
Q15648	0
Q15650	0
P15498	0
Q9BTK6	0
P08579	0
Q96J02	0
O75688	0
Q14CS0	0
Q9UL18	0
Q5S007	0
O95985	0
Q9NWV8	0
P08047	0
Q9Y5Q9	0
P62306	0
Q9Y5Q8	0
Q99972	0
Q9UKI2	0
Q99460	0
Q05209	0
O14818	0
O95425	0
Q99102	0
P26368	0
Q9UNN4	0
P11171	0
Q12888	0
P43004	0
P27701	0
P16949	0
Q02297	0
O60313	0
Q99590	0
Q9ULX6	0
Q96A83	0
Q13155	0
P62945	0
Q9UK45	0
Q8WVB3	0
P53778	0
Q9UNF0	0
P42229	0
P08648	0
Q13438	0
P62310	0
O15399	0
Q8TEQ6	0
Q05586	0
O75629	0
Q9Y4Z0	0
O95835	0
P80370	0
Q9UQQ2	0
Q13422	0
P57075	0
P48549	0
Q13772	0
P48544	0
P60763	0
P10145	0
Q96AQ9	0
Q9Y4Y9	0
Q9NWA0	0
P22087	0
Q99569	0
P26639	0
Q15637	0
P32004	0
Q04323	0
P54725	0
O43678	0
O15479	0
P43357	0
Q13765	0
P07237	0
O94776	0
Q53T94	0
P30153	0
Q14457	0
P62714	0
Q15645	0
P62913	0
P01011	0
O15354	0
Q15119	0
P01138	0
P01137	0
Q96LJ8	0
Q6P1Q9	0
Q9H840	0
P43034	0
Q13449	0
Q9NX58	0
Q53G35	0
P01127	0
P35237	0
Q3V6T2	0
Q9H299	0
Q9H0D6	0
P62191	0
O14964	0
O75409	0
Q14814	0
Q9HAW0	0
Q86YM7	0
P35754	0
Q13617	0
Q14515	0
P07196	0
P49915	0
P24941	0
Q8ND30	0
Q8WV28	0
Q14565	0
P12273	0
Q9BRP8	0
Q8WXD5	0
Q8TAT6	0
P46734	0
Q6MZP7	0
Q01105	0
Q96Q45	0
Q96G01	0
Q7Z589	0
O60496	0
Q9UKA9	0
P83916	0
Q02548	0
Q99704	0
Q01844	0
P14625	0
Q8WW43	0
Q96D37	0
Q93009	0
Q9NX24	0
P49736	0
Q12962	0
O95218	0
Q9BRG2	0
Q01130	0
P22626	0
P13591	0
P46108	0
P00558	0
Q9BXS0	0
Q16816	0
Q92598	0
P05814	0
O75155	0
Q99828	0
P49796	0
P49792	0
Q96GD4	0
Q12947	0
Q9BQE4	0
Q05655	0
P60568	0
P13984	0
P62877	0
Q8TEW6	0
P11940	0
P41159	0
Q9HAU4	0
Q70EK8	0
Q9BUJ2	0
Q9NY61	0
P23443	0
Q9BZV1	0
P47710	0
P29692	0
Q96A00	0
P08133	0
O95645	0
O00244	0
O75494	0
O00291	0
Q13562	0
O94906	0
P51812	0
P00750	0
Q9BRJ6	0
O14618	0
Q9UQC2	0
Q06609	0
P49454	0
P61626	0
P41180	0
Q9BUI4	0
Q12913	0
P35579	0
Q5SXM2	0
Q96PK6	0
O00214	0
Q15121	0
P35520	0
O75935	0
Q08495	0
Q9Y6E0	0
Q13275	0
P63000	0
Q96FW1	0
Q99719	0
O00567	0
Q5EBL8	0
Q08170	0
P49810	0
P63162	0
Q15046	0
P14867	0
P40818	0
Q86W91	0
Q6P2Q9	0
Q9Y265	0
Q96NY7	0
O00193	0
Q9Y261	0
O94868	0
Q53TM5	0
Q9HB96	0
P62253	0
P35240	0
Q9H0K1	0
Q9UPT6	0
Q7Z7G1	0
Q12959	0
Q16539	0
P52732	0
Q01970	0
Q15262	0
Q13131	0
O75460	0
O15287	0
Q9Y2W7	0
Q08209	0
P04085	0
Q9Y230	0
P23763	0
Q15596	0
O75489	0
P51114	0
Q92597	0
P53041	0
Q00610	0
O95793	0
Q12846	0
O14776	0
Q9Y3C7	0
Q86YC2	0
P35568	0
P14210	0
P28074	0
P27105	0
Q9P013	0
Q5UIP0	0
Q16795	0
Q8NHG7	0
Q15363	0
P49840	0
Q86TM6	0
P40189	0
O95402	0
O76071	0
Q969X6	0
Q92575	0
Q9UJM3	0
Q8WUA4	0
Q9BQG0	0
O75928	0
P45973	0
Q01085	0
P16144	0
O00443	0
Q15573	0
Q15572	0
O95819	0
Q8TF42	0
Q8NC44	0
Q9BYW2	0
O00507	0
Q13393	0
Q14190	0
O00459	0
Q8IZX4	0
O94855	0
P14543	0
P41252	0
P09958	0
Q13387	0
O75400	0
O75925	0
Q9H1D9	0
P05112	0
Q05193	0
O15394	0
P31150	0
P54646	0
Q9UJY5	0
P30281	0
O43390	0
P42684	0
P42681	0
P42680	0
Q9Y3E7	0
Q16342	0
Q9NQ66	0
Q86Y79	0
P42679	0
Q9H4P4	0
Q92806	0
P20151	0
Q92890	0
P07711	0
P60510	0
P08575	0
Q9Y6I3	0
P52735	0
P62304	0
P35869	0
P61266	0
O00124	0
Q15785	0
Q92994	0
Q9H9S3	0
P20823	0
P00414	0
Q9UKY1	0
Q9UKE5	0
Q92625	0
Q5TEW3	0
Q9UPQ9	0
P22681	0
Q15223	0
Q504X9	0
O43175	0
O43639	0
P22301	0
Q9BZE9	0
P51693	0
P63146	0
Q4W5T8	0
Q96GY3	0
Q5VU43	0
Q96TA2	0
P07148	0
Q8ND90	0
P98160	0
Q96EH3	0
P02647	0
Q9BVJ6	0
Q16653	0
P62826	0
O00182	0
P54619	0
P62318	0
P20916	0
Q6LCG8	0
Q15047	0
Q9Y2X7	0
P22736	0
Q6GYA4	0
Q8WU68	0
O75439	0
Q99466	0
Q96LT9	0
Q13671	0
P31942	0
Q9H013	0
P62837	0
P98077	0
Q9H1Y0	0
P01889	0
P27694	0
Q02156	0
Q9P0L2	0
Q8IX01	0
P07498	0
P84090	0
O14981	0
P35080	0
Q13409	0
Q9Y371	0
Q92934	0
P20585	0
P21980	0
Q9NTG7	0
P10827	0
Q13283	0
Q969F0	0
P02786	0
P15309	0
Q8N5U6	0
Q15527	0
Q9NYV6	0
Q6ZV89	0
P12544	0
O00750	0
P25098	0
Q99650	0
P14859	0
P41220	0
P10809	0
O75293	0
P10914	0
P42658	0
O43312	0
P25788	0
Q8IY92	0
Q15853	0

## Sheet: TI3
Uniprot	TI3
P04626	223.961
P20226	191.16
P04156	140.986
Q16637	140.258
P55072	121.148
P49768	101.377
P42858	99.1665
P37840	96.5264
O60260	95.0524
P37231	88.6098
P01023	84.5745
Q14203	82.8154
P10636	71.1466
P35637	70.9978
P51587	64.4359
P21675	52.1624
Q6Y7W6	46.971
P43354	41.7959
P22314	41.7086
P28799	32.44
P09936	32.0559
P00749	31.9867
O43464	30.947
Q9UGJ0	28.7098
Q99497	26.5996
Q13148	23.5557
Q9UQN3	22.563
Q96QT4	22.3654
Q9Y3I1	22.0469
Q9HBA0	21.8776
O95292	21.3177
P00441	20.4326
Q6ZW49	19.4698
P03950	19
Q13867	15.6838
Q01959	15.1756
P19404	14.5359
P21917	13.6191
Q92870	10.5504
Q16143	9.40075
P62988	9.18198
P41219	9
Q92673	8.53653
Q30201	8.40855
Q04656	7.82639
Q7Z333	7.8125
P62993	7.76032
P05067	7.23991
P12821	7
Q9BXM7	6.56225
P12036	6.4353
P09172	5.81481
Q8WXH2	5.80886
P42574	4.68415
P04637	4.53904
P35222	4.53762
Q16595	4.41123
P63279	4.33374
P49841	3.94187
P05164	3.88116
Q9UNE7	3.79914
P40337	3.34307
P19174	3.31804
P00533	3.26638
P19793	3.18062
P24928	3.15865
P07437	3.05142
P63104	3.02676
P29466	3.0211
P00326	3
Q92562	3
Q08AM6	3
P06241	2.92043
P13569	2.87529
Q9NRD5	2.85457
P11142	2.85429
P11021	2.79454
Q15796	2.78469
Q16623	2.59968
Q13190	2.58616
P10415	2.52518
P01106	2.51678
P31946	2.50988
Q9H3D4	2.4982
Q13322	2.4947
P02649	2.48203
P54257	2.47894
P16333	2.47847
P00450	2.46767
Q13616	2.45904
P23246	2.44593
Q92793	2.44534
P78352	2.44426
P28702	2.43321
P28482	2.43034
Q96Q42	2.38768
P38398	2.33298
P00519	2.33141
P02787	2.32885
P07900	2.30894
P55210	2.30203
P62380	2.26655
Q92905	2.26556
P84022	2.26125
P55212	2.26068
P46527	2.24622
Q9UQF2	2.23766
Q9Y4K3	2.23403
Q00535	2.20409
Q14790	2.20409
O60869	2.20308
P06400	2.20308
O00268	2.19787
P68400	2.18208
P06493	2.17985
O43236	2.14011
P08107	2.14011
Q04206	2.12959
P62158	2.10759
Q16594	2.09611
Q9UJY4	2.07041
Q13510	2.02683
P12814	2.01152
Q12933	1.99204
P07858	1.96149
P16220	1.94513
P61769	1.90885
P00747	1.9026
Q14152	1.86997
Q14194	1.85769
Q15388	1.85174
Q13490	1.8444
Q15287	1.84177
Q06481	1.83101
P49639	1.82649
P46109	1.80761
Q8NFJ9	1.80129
P54259	1.79565
O15503	1.79425
Q7L5N1	1.78483
Q7Z6E9	1.78483
P46821	1.78296
P46379	1.77679
Q92956	1.76703
P63165	1.75995
O00213	1.75252
Q03135	1.75252
P01584	1.74813
P10275	1.74648
P09012	1.74596
P14678	1.74596
Q8WUM5	1.74596
Q9UHI6	1.74596
P11308	1.73599
Q15717	1.72168
P10909	1.70792
A0JLT2	1.70746
P07197	1.69512
Q08211	1.69465
Q9ULW3	1.68925
P20936	1.68384
P50616	1.68318
O94985	1.67761
P51784	1.67709
P62330	1.67473
O60674	1.6717
P26045	1.6717
Q9Y2R2	1.6717
P53350	1.67121
P03372	1.67037
P21964	1.66667
P30411	1.66667
P50052	1.66667
Q9UBN7	1.66325
P12830	1.65873
P14923	1.65873
P27986	1.65873
P35221	1.65873
P49662	1.65028
Q9NV58	1.64705
P25054	1.63984
Q12906	1.63984
O75376	1.63924
Q96CV9	1.63924
Q9Y618	1.62832
Q14686	1.62578
Q15788	1.62578
Q9Y6Q9	1.62578
Q8N2W9	1.62311
Q96ST3	1.62311
Q9UNZ2	1.62124
P08047	1.62057
Q13363	1.62057
O96017	1.61772
Q16695	1.61634
O75815	1.61556
Q14451	1.61556
Q9Y490	1.61556
P22695	1.61018
Q15653	1.60844
P19784	1.60478
Q53QZ3	1.60478
Q96A73	1.60478
Q9NPF8	1.60478
P21333	1.60475
P67809	1.6036
P06239	1.60357
P12931	1.60357
P25685	1.60259
Q15011	1.59679
Q15811	1.59259
Q9BSG0	1.59259
P09769	1.58591
P43405	1.58591
Q14289	1.58591
P56524	1.58265
Q09472	1.58265
P42566	1.57882
P08670	1.57745
Q01082	1.57745
P24864	1.57326
P34932	1.56531
P30480	1.5651
Q9BY11	1.55376
Q8IVM0	1.55362
Q969H0	1.55233
P17947	1.55229
P27824	1.54163
P32121	1.54163
P45983	1.54131
P61764	1.54078
Q16512	1.54078
P08238	1.53749
Q96L34	1.53745
P46934	1.53366
Q99728	1.5281
Q9BXW9	1.5281
P62258	1.52264
P16885	1.51857
Q5VTD9	1.51809
O60716	1.511
Q07817	1.511
P18206	1.50916
P19012	1.5
P20700	1.5
P23942	1.5
Q9Y4I1	1.5
P07947	1.48549
Q04917	1.47951
Q5S007	1.47951
Q71U36	1.47951
Q9Y6H5	1.47951
P68036	1.47568
Q9Y385	1.47568
P24385	1.47103
P31749	1.46877
O15264	1.464
Q96S59	1.45946
Q15418	1.45785
O00141	1.45664
P67775	1.45664
P07948	1.45583
P21810	1.44841
Q9Y6E0	1.44841
P23508	1.44212
Q14164	1.44212
P68366	1.41218
Q9UQM7	1.41218
P20248	1.39014
O60739	1.38597
P56537	1.38597
O00244	1.38542
P35754	1.38542
Q5EBL8	1.38542
P01100	1.38085
P05412	1.38085
P09429	1.38085
P17480	1.38085
P26367	1.38085
P28360	1.38085
P29083	1.38085
P35269	1.38085
P49848	1.38085
P52655	1.38085
P53999	1.38085
P62899	1.38085
Q00613	1.38085
Q00987	1.38085
Q12962	1.38085
Q15542	1.38085
Q15543	1.38085
Q15544	1.38085
Q15545	1.38085
Q16514	1.38085
Q16548	1.38085
Q5H9L4	1.38085
Q6P1X5	1.38085
Q92804	1.38085
P19419	1.37969
P34947	1.37969
P43250	1.37969
Q15835	1.37969
Q13501	1.37084
Q13526	1.37084
P02647	1.36458
P02768	1.36458
Q9H5V8	1.36458
P13473	1.35632
P13385	1.22222
P13489	1.22222
P19883	1.22222
P32971	1.22222
P35609	1.22222
P60484	1.22222
P68032	1.22222
Q15904	1.22222
Q8TCC1	1.22222
O75439	1.16935
O15162	1.12968
O15550	1.12968
O60356	1.12968
P20585	1.12968
P29590	1.12968
Q02962	1.12968
Q12888	1.12968
Q96BR9	1.12968
Q9BTK6	1.12968
P09958	1.12962
P30533	1.12962
Q9UJY5	1.12962
Q14457	1.09132
Q9GZQ8	1.09132
O43741	1.06387
P00558	1.06387
P08243	1.06387
P26639	1.06387
P49915	1.06387
P54619	1.06387
P54646	1.06387
Q02790	1.06387
Q13131	1.06387
Q14697	1.06387
Q504X9	1.06387
Q9H492	1.06387
Q9Y478	1.06387
O43175	1.04137
P22736	1.04137
P36542	1.04137
P40818	1.04137
P49454	1.04137
Q70EL1	1.04137
Q8ND90	1.04137
Q96EH3	1.04137
Q9C005	1.04137
Q9Y3E7	1.04137
O43678	1.04067
O75306	1.04067
O75489	1.04067
Q16795	1.04067
Q92993	1.04067
Q9HB58	1.04067
P02686	1.03904
P04083	1.03904
P13639	1.03904
P35579	1.03904
P35580	1.03904
Q00722	1.03904
Q01970	1.03904
Q7Z406	1.03904
Q9BX84	1.03904
Q9NQ66	1.03904
Q9NP95	1.03797
P14867	1.03435
P48544	1.03435
P48549	1.03435
Q53G59	1.03435
Q92806	1.03435
Q96NY7	1.03435
P00734	1.01691
P00750	1.01691
P05120	1.01691
P05121	1.01691
P07093	1.01691
P07711	1.01691
P08697	1.01691
P11717	1.01691
P14210	1.01691
P14543	1.01691
P35237	1.01691
P98164	1.01691
Q03405	1.01691
Q9Y5Y6	1.01691
O75962	0.99765
P47914	0.99765
P62913	0.99765
Q6FI68	0.99765
Q70EK8	0.99765
Q8NC44	0.99765
Q8WVZ9	0.99765
P23763	0.98936
P32856	0.98936
P48039	0.98936
P61266	0.98936
P63027	0.98936
Q12846	0.98936
Q96SU4	0.98936
Q9P0L0	0.98936
Q9Y2K6	0.98936
P02786	0.96426
Q9UP52	0.96426
O95835	0.95067
P05814	0.95067
P47710	0.95067
P98170	0.95067
Q13489	0.95067
Q15121	0.95067
Q16539	0.95067
Q93009	0.95067
Q96CA5	0.95067
Q9NR09	0.95067
Q9NR28	0.95067
Q9NWQ8	0.95067
Q9P0J0	0.95067
Q13485	0.94531
Q547Q3	0.94531
Q8NDD8	0.94531
Q9HCE7	0.94531
O00182	0.94458
O00193	0.94458
O00214	0.94458
P01127	0.94458
P01137	0.94458
P01138	0.94458
P02760	0.94458
P04085	0.94458
P04180	0.94458
P04278	0.94458
P05112	0.94458
P05231	0.94458
P07288	0.94458
P08133	0.94458
P08253	0.94458
P09038	0.94458
P09466	0.94458
P10145	0.94458
P12544	0.94458
P14091	0.94458
P17931	0.94458
P20151	0.94458
P22301	0.94458
P41159	0.94458
P55040	0.94458
P60568	0.94458
P60953	0.94458
P61626	0.94458
P61812	0.94458
Q07954	0.94458
Q15582	0.94458
Q8IXA5	0.94458
Q96IY4	0.94458
Q99972	0.94458
Q9H013	0.94458
Q9UHI8	0.94458
Q9UKR3	0.94458
Q9UNI1	0.94458
Q9Y337	0.94458
O75928	0.94293
O94966	0.94293
P30153	0.94293
P30154	0.94293
Q5THR3	0.94293
Q6MZP7	0.94293
Q8IY92	0.94293
Q96GY3	0.94293
Q9NWV8	0.94293
Q9UBT2	0.94293
Q9UER7	0.94293
O15198	0.94079
O60563	0.94079
O95985	0.94079
P03973	0.94079
P08246	0.94079
P17735	0.94079
P50750	0.94079
P52790	0.94079
P80370	0.94079
P98160	0.94079
Q96AQ9	0.94079
Q96RU7	0.94079
Q9NTG7	0.94079
P30281	0.89373
P49427	0.89373
P62837	0.89373
P62877	0.89373
P63208	0.89373
Q00534	0.89373
Q92530	0.89373
Q99607	0.89373
O00186	0.8911
O00567	0.8911
O14893	0.8911
O15116	0.8911
O43390	0.8911
O60383	0.8911
O60506	0.8911
O75817	0.8911
O95149	0.8911
O95218	0.8911
O95402	0.8911
P04908	0.8911
P08579	0.8911
P08621	0.8911
P09382	0.8911
P09661	0.8911
P22087	0.8911
P22626	0.8911
P27105	0.8911
P31942	0.8911
P31943	0.8911
P38432	0.8911
P57678	0.8911
P60510	0.8911
P62304	0.8911
P62306	0.8911
P62308	0.8911
P62310	0.8911
P62312	0.8911
P62314	0.8911
P62316	0.8911
P62318	0.8911
P83369	0.8911
P84090	0.8911
Q00839	0.8911
Q01085	0.8911
Q13432	0.8911
Q14974	0.8911
Q15233	0.8911
Q53GF4	0.8911
Q5JVS0	0.8911
Q5T3J3	0.8911
Q5UIP0	0.8911
Q8TEQ6	0.8911
Q8WXD5	0.8911
Q92841	0.8911
Q92882	0.8911
Q96AE4	0.8911
Q96HA8	0.8911
Q96PV6	0.8911
Q9BQ83	0.8911
Q9BQG0	0.8911
Q9H840	0.8911
Q9NWA0	0.8911
Q9NWZ8	0.8911
Q9NY12	0.8911
Q9UK45	0.8911
Q9Y2W1	0.8911
Q9Y333	0.8911
Q9Y3F4	0.8911
Q9Y4Y9	0.8911
Q9Y4Z0	0.8911
P07196	0.88902
O15394	0.8857
O43414	0.8857
O43781	0.8857
O75077	0.8857
P07237	0.8857
P07498	0.8857
P09543	0.8857
P10809	0.8857
P13591	0.8857
P20916	0.8857
P25788	0.8857
P29372	0.8857
P31948	0.8857
P32004	0.8857
P42658	0.8857
P46695	0.8857
P51693	0.8857
P61964	0.8857
P62945	0.8857
P67870	0.8857
Q05193	0.8857
Q08E93	0.8857
Q12860	0.8857
Q13449	0.8857
Q13642	0.8857
Q14011	0.8857
Q14515	0.8857
Q14982	0.8857
Q15223	0.8857
Q15527	0.8857
Q15776	0.8857
Q16653	0.8857
Q5VU43	0.8857
Q6ZUS6	0.8857
Q86Y79	0.8857
Q8IV54	0.8857
Q8ND30	0.8857
Q8NDX6	0.8857
Q8TAI1	0.8857
Q92913	0.8857
Q969D9	0.8857
Q969X6	0.8857
Q96A00	0.8857
Q96LT9	0.8857
Q96NN9	0.8857
Q96Q45	0.8857
Q9BRJ6	0.8857
Q9BRP8	0.8857
Q9BSJ6	0.8857
Q9BT17	0.8857
Q9BWG6	0.8857
Q9H0S4	0.8857
Q9H4B4	0.8857
Q9H9D4	0.8857
Q9HCC9	0.8857
Q9NW64	0.8857
Q9NX24	0.8857
Q9P013	0.8857
Q9UIF8	0.8857
Q9UL18	0.8857
Q9ULX3	0.8857
Q9Y3Q8	0.8857
O00443	0.86682
O00459	0.86682
O00750	0.86682
O14492	0.86682
O14654	0.86682
O14796	0.86682
O15524	0.86682
O43639	0.86682
O60496	0.86682
O75368	0.86682
O75553	0.86682
O75791	0.86682
O95704	0.86682
P01011	0.86682
P01133	0.86682
P01135	0.86682
P04439	0.86682
P08575	0.86682
P08648	0.86682
P14625	0.86682
P15309	0.86682
P15498	0.86682
P15882	0.86682
P15941	0.86682
P16070	0.86682
P16144	0.86682
P16591	0.86682
P21860	0.86682
P23458	0.86682
P23467	0.86682
P23470	0.86682
P23471	0.86682
P27701	0.86682
P29353	0.86682
P35070	0.86682
P35240	0.86682
P35568	0.86682
P40189	0.86682
P40763	0.86682
P42224	0.86682
P42679	0.86682
P42680	0.86682
P42681	0.86682
P42684	0.86682
P46108	0.86682
P51451	0.86682
P51813	0.86682
P52735	0.86682
P78314	0.86682
P98077	0.86682
Q02297	0.86682
Q05209	0.86682
Q05397	0.86682
Q06124	0.86682
Q07889	0.86682
Q08881	0.86682
Q12913	0.86682
Q13153	0.86682
Q13239	0.86682
Q13387	0.86682
Q13671	0.86682
Q15262	0.86682
Q15303	0.86682
Q16827	0.86682
Q5TCU5	0.86682
Q5TEW3	0.86682
Q63HR2	0.86682
Q68CZ2	0.86682
Q6PKX4	0.86682
Q6S5L8	0.86682
Q6ZV89	0.86682
Q71V34	0.86682
Q7KZ85	0.86682
Q7Z6G8	0.86682
Q7Z7G1	0.86682
Q8TEW6	0.86682
Q8WU20	0.86682
Q8WV28	0.86682
Q8WYP3	0.86682
Q92529	0.86682
Q92569	0.86682
Q92625	0.86682
Q96D37	0.86682
Q96RT1	0.86682
Q99102	0.86682
Q99650	0.86682
Q99704	0.86682
Q99952	0.86682
Q9BRG2	0.86682
Q9H299	0.86682
Q9H6Q3	0.86682
Q9NP31	0.86682
Q9NSE2	0.86682
Q9UJM3	0.86682
Q9UKW4	0.86682
Q9UQC2	0.86682
Q9UQQ2	0.86682
Q9Y6R0	0.86682
O14593	0.85837
O15020	0.85837
O60244	0.85837
O75935	0.85837
O76071	0.85837
O94833	0.85837
O94855	0.85837
P11171	0.85837
P18669	0.85837
P20340	0.85837
P27695	0.85837
P30622	0.85837
P42025	0.85837
P42575	0.85837
P43034	0.85837
P43360	0.85837
P46734	0.85837
P52564	0.85837
P52732	0.85837
P61163	0.85837
Q13409	0.85837
Q14204	0.85837
Q15436	0.85837
Q15691	0.85837
Q53G35	0.85837
Q7L1Q6	0.85837
Q8TD16	0.85837
Q92834	0.85837
Q96G01	0.85837
Q96KM6	0.85837
Q96RK4	0.85837
Q99551	0.85837
Q9H8T0	0.85837
Q9NRI5	0.85837
Q9UPT6	0.85837
Q9Y2Q3	0.85837
O94906	0.85486
P06729	0.85486
P09234	0.85486
P11940	0.85486
P26368	0.85486
P51114	0.85486
P63162	0.85486
Q13283	0.85486
Q14240	0.85486
Q14444	0.85486
Q6P2Q9	0.85486
Q7Z591	0.85486
Q7Z627	0.85486
Q8WU68	0.85486
Q9NTZ6	0.85486
Q9UKV8	0.85486
Q9UPQ9	0.85486
Q9Y2W2	0.85486
O14618	0.84217
P14652	0.84217
P29692	0.84217
P51571	0.84217
Q08209	0.84217
Q15046	0.84217
Q76N89	0.84217
A5YKK6	0.82223
O15379	0.82223
O60337	0.82223
O75293	0.82223
O75448	0.82223
O95257	0.82223
O95425	0.82223
O95819	0.82223
P07148	0.82223
P16949	0.82223
P17096	0.82223
P21283	0.82223
P21579	0.82223
P28069	0.82223
P35228	0.82223
P48443	0.82223
P48552	0.82223
P51532	0.82223
P51843	0.82223
Q12756	0.82223
Q12778	0.82223
Q13772	0.82223
Q15466	0.82223
Q15596	0.82223
Q15648	0.82223
Q16236	0.82223
Q3V6T2	0.82223
Q5VT06	0.82223
Q6STE5	0.82223
Q99460	0.82223
Q9BUJ2	0.82223
Q9BYK8	0.82223
Q9H0E9	0.82223
Q9HCK8	0.82223
Q9UBK2	0.82223
O43294	0.8184
P14416	0.8184
P63244	0.8184
Q13424	0.8184
Q9Y6I3	0.8184
O00291	0.81702
O14776	0.81702
O43312	0.81702
O75146	0.81702
O75400	0.81702
O75409	0.81702
O75446	0.81702
O94973	0.81702
O95163	0.81702
P04406	0.81702
P12270	0.81702
P12956	0.81702
P21980	0.81702
P23610	0.81702
P35080	0.81702
P35520	0.81702
P43357	0.81702
P61086	0.81702
Q02779	0.81702
Q12873	0.81702
Q13011	0.81702
Q13127	0.81702
Q13562	0.81702
Q15119	0.81702
Q15642	0.81702
Q6NWY9	0.81702
Q8IUH5	0.81702
Q8IZQ1	0.81702
Q92797	0.81702
Q96D09	0.81702
Q99689	0.81702
Q99963	0.81702
Q9BVA6	0.81702
Q9BVJ6	0.81702
Q9BYW2	0.81702
Q9NX55	0.81702
Q9P2H0	0.81702
Q9ULX6	0.81702
Q9Y2X7	0.81702
Q9Y371	0.81702
Q9Y3C7	0.81702
P09651	0.81636
Q01780	0.81636
Q15047	0.81636
Q5VWX1	0.81636
Q9BTT4	0.81636
Q9H0D6	0.81636
Q9NX70	0.81636
Q9UKY1	0.81636
O15287	0.81284
O60566	0.81284
O94776	0.81284
P15927	0.81284
P24941	0.81284
P27694	0.81284
P42229	0.81284
P46736	0.81284
P54277	0.81284
P54278	0.81284
P54725	0.81284
P60896	0.81284
Q06609	0.81284
Q13309	0.81284
Q13315	0.81284
Q13535	0.81284
Q14565	0.81284
Q7Z589	0.81284
Q86YC2	0.81284
Q8N1V2	0.81284
Q92831	0.81284
Q96GD4	0.81284
Q9HB96	0.81284
Q9NXR7	0.81284
Q9P0W2	0.81284
Q9P287	0.81284
O43920	0.8061
O60313	0.8061
P10109	0.8061
P10276	0.8061
P10826	0.8061
P49918	0.8061
P51814	0.8061
P62826	0.8061
P78347	0.8061
Q5H9L2	0.8061
Q8IX01	0.8061
Q9BTT0	0.8061
Q9NP64	0.8061
Q9NZ45	0.8061
Q9UIG0	0.8061
O00124	0.80488
O00221	0.80488
O00237	0.80488
O75688	0.80488
O94868	0.80488
O94888	0.80488
O94941	0.80488
O95155	0.80488
P01889	0.80488
P04234	0.80488
P14784	0.80488
P20618	0.80488
P20823	0.80488
P25963	0.80488
P28074	0.80488
P41180	0.80488
P54252	0.80488
P62191	0.80488
Q04323	0.80488
Q13617	0.80488
Q14139	0.80488
Q14191	0.80488
Q14CS0	0.80488
Q15785	0.80488
Q16665	0.80488
Q6EEV6	0.80488
Q6GYA4	0.80488
Q86TM6	0.80488
Q8NHG7	0.80488
Q8TAT6	0.80488
Q92575	0.80488
Q92597	0.80488
Q92890	0.80488
Q96CS3	0.80488
Q96JH7	0.80488
Q96LJ8	0.80488
Q99759	0.80488
Q9BQE4	0.80488
Q9BUN8	0.80488
Q9BZE9	0.80488
Q9BZV1	0.80488
Q9H0K1	0.80488
Q9H9S3	0.80488
Q9P0W5	0.80488
Q9P2S5	0.80488
Q9UKV5	0.80488
Q9UNN5	0.80488
Q9Y244	0.80488
O14981	0.80355
O15446	0.80355
O43379	0.80355
O75155	0.80355
O75629	0.80355
O75925	0.80355
P01574	0.80355
P04150	0.80355
P09086	0.80355
P10914	0.80355
P13984	0.80355
P14859	0.80355
P17535	0.80355
P18848	0.80355
P20265	0.80355
P20749	0.80355
P23193	0.80355
P23760	0.80355
P25208	0.80355
P28347	0.80355
P29084	0.80355
P29375	0.80355
P35869	0.80355
P35998	0.80355
P36508	0.80355
P45973	0.80355
P49736	0.80355
P52657	0.80355
P55317	0.80355
P61978	0.80355
P78317	0.80355
Q00403	0.80355
Q01105	0.80355
Q01658	0.80355
Q01892	0.80355
Q02548	0.80355
Q03060	0.80355
Q04864	0.80355
Q12947	0.80355
Q13422	0.80355
Q13487	0.80355
Q13765	0.80355
Q13887	0.80355
Q13952	0.80355
Q14919	0.80355
Q15035	0.80355
Q15572	0.80355
Q15573	0.80355
Q15650	0.80355
Q16533	0.80355
Q53T94	0.80355
Q59EC8	0.80355
Q5SXM2	0.80355
Q5VWG9	0.80355
Q8IYA7	0.80355
Q8IZX4	0.80355
Q8WUA4	0.80355
Q92994	0.80355
Q969F0	0.80355
Q96A83	0.80355
Q99967	0.80355
Q9BUI4	0.80355
Q9H1D9	0.80355
Q9H5J8	0.80355
Q9HAW0	0.80355
Q9NYV6	0.80355
Q9P0U4	0.80355
Q9UKN8	0.80355
Q9UNN4	0.80355
Q9Y230	0.80355
Q9Y261	0.80355
Q9Y265	0.80355
Q9Y5Q8	0.80355
Q9Y5Q9	0.80355
Q9Y6X2	0.80355
O00548	0.79191
O43187	0.79191
O75369	0.79191
O75460	0.79191
O95645	0.79191
P14136	0.79191
P17612	0.79191
P31150	0.79191
P46531	0.79191
P49755	0.79191
P49810	0.79191
P52799	0.79191
P56817	0.79191
P62491	0.79191
Q02410	0.79191
Q04721	0.79191
Q05513	0.79191
Q15363	0.79191
Q4W5T8	0.79191
Q53TM5	0.79191
Q6LCG8	0.79191
Q6P1Q9	0.79191
Q6PIL6	0.79191
Q86W91	0.79191
Q8IZD9	0.79191
Q8WW43	0.79191
Q92542	0.79191
Q96BI3	0.79191
Q96TA2	0.79191
Q99466	0.79191
Q99569	0.79191
Q99590	0.79191
Q99828	0.79191
Q9NQB0	0.79191
Q9NZ42	0.79191
Q9NZJ7	0.79191
Q9UM47	0.79191
Q9UMF0	0.79191
Q9UMX0	0.79191
Q9UQB3	0.79191
Q9Y2W7	0.79191
O14818	0.76042
O14867	0.76042
O14933	0.76042
O14936	0.76042
O15354	0.76042
O60671	0.76042
P23258	0.76042
P25786	0.76042
P25789	0.76042
P31689	0.76042
P41220	0.76042
P49792	0.76042
P49796	0.76042
P53667	0.76042
P57075	0.76042
P60763	0.76042
P62253	0.76042
P63000	0.76042
P68402	0.76042
P78396	0.76042
Q12959	0.76042
Q13155	0.76042
Q13224	0.76042
Q14190	0.76042
Q15645	0.76042
Q16342	0.76042
Q5U5U6	0.76042
Q86YM7	0.76042
Q8TF42	0.76042
Q8WVB3	0.76042
Q96C32	0.76042
Q99719	0.76042
Q9BT88	0.76042
Q9H4P4	0.76042
Q9NRX3	0.76042
O15399	0.74874
O15479	0.74874
O75494	0.74874
O75554	0.74874
P10827	0.74874
P26599	0.74874
P52565	0.74874
P61244	0.74874
P82979	0.74874
Q01130	0.74874
Q05586	0.74874
Q08170	0.74874
Q15428	0.74874
Q15637	0.74874
Q15853	0.74874
Q8IYB3	0.74874
Q96FW1	0.74874
Q96PK6	0.74874
Q99873	0.74874
Q99959	0.74874
Q9HAU4	0.74874
Q9NX58	0.74874
Q9UBW7	0.74874
Q9UKA9	0.74874
Q9Y446	0.74874
P08631	0.73675
Q13438	0.73675
Q14244	0.73675
Q96J02	0.73675
Q9UKS6	0.73675
Q9UNF0	0.73675
O14613	0.71909
O14656	0.71909
O43255	0.71909
O75914	0.71909
O94811	0.71909
O95139	0.71909
P00414	0.71909
P07101	0.71909
P21796	0.71909
P25098	0.71909
P27361	0.71909
P41252	0.71909
P45880	0.71909
P99999	0.71909
Q00610	0.71909
Q02156	0.71909
Q07812	0.71909
Q08495	0.71909
Q10567	0.71909
Q13393	0.71909
Q14814	0.71909
Q15019	0.71909
Q8IUQ4	0.71909
Q8N5U6	0.71909
Q92876	0.71909
Q92934	0.71909
Q9BXS0	0.71909
Q9H0R8	0.71909
Q9NRR8	0.71909
Q9UKI2	0.71909
O14964	0.71526
O75069	0.71526
P12273	0.71526
P22681	0.71526
P63146	0.71526
Q13275	0.71526
Q5VTR2	0.71526
Q86Y13	0.71526
Q92598	0.71526
Q96PU5	0.71526
Q9BYM8	0.71526
Q9H2C0	0.71526
Q9Y297	0.71526
Q9Y5U2	0.71526
Q96BT3	0.6606
O00507	0.65175
O15294	0.65175
O15428	0.65175
O75582	0.65175
O95793	0.65175
P04271	0.65175
P11277	0.65175
P23443	0.65175
P43004	0.65175
P49840	0.65175
P51812	0.65175
P53041	0.65175
P53778	0.65175
P60709	0.65175
P62714	0.65175
Q05655	0.65175
Q15172	0.65175
Q16816	0.65175
Q8TER5	0.65175
Q9NY61	0.65175
Q9P0L2	0.65175
P19013	0.63723
P83916	0.63723
Q04695	0.63723
Q15843	0.63723
Q49A88	0.63723
Q59EM9	0.63723
Q9H1Y0	0.63723
Q9UK80	0.63723
Q9UKE5	0.63723
P28749	0.5773
Q01844	0.5773
Q08999	0.5773
Q9HCU9	0.5773
Q9NVP2	0.5773
Q9Y294	0.5773
