# Supplementary material for: Network Analysis of Neurodegenerative Disease Highlights a Role of Toll-Like Receptor Signaling
Source: Biomed Res Int. 2014 Jan 16;2014:686505. doi: 10.1155/2014/686505 (PMC3914352; doi:10.1155/2014/686505)
Supplement: Supplementary file 1 — Suppl 1: The list of disease proteins and their corresponding diseases. Suppl 2: The lists of disease proteins occurring in the six corresponding components. Suppl 3: The computations and distribution diagrams for network centrality indices. Each worksheet presents one centrality. Suppl 4: The list of connector proteins of the different diseases. Suppl 5: The ranking of disease association using the network-based approach and the text mining approach. The same disease pair in the different rows is highlighted by the same color. Suppl 6: Network of significantly enriched GO terms. This schematic network illustrates GO terms that were significantly enriched in the ALS-PD (A) and FTD-PD (B) connector proteins, as well as the overlap between related terms. GO terms containing at least 10 connector proteins, and occurring in levels 3-8 of the GO hierarchy were considered in the analysis. Terms that were significantly enriched (p<0.05 after correction for multiple testing) with connector proteins are depicted. Node colours and inset bar indicate the p value for enrichment of each term, after correction for multiple testing. [file 686505.f1.zip › Suppl4_ConnectorProteins.xlsx]

## Sheet: Sheet1
Protein		Disease pair
P05067		AD-PD
P00533		AD-PD
P63279		AD-PD
P11308		AD-PD
P62993		AD-PD
P02649		AD-PD
P01584		AD-PD
	AD-PD Count	7
Q9NPF8		PD-HD
Q9ULW3		PD-HD
Q96L34		PD-HD
Q96ST3		PD-HD
Q96A73		PD-HD
Q92793		PD-HD
Q8N2W9		PD-HD
Q53QZ3		PD-HD
Q14194		PD-HD
P78352		PD-HD
P68400		PD-HD
P62993		PD-HD
P63165		PD-HD
P29466		PD-HD
P31749		PD-HD
P42574		PD-HD
P55212		PD-HD
P62258		PD-HD
P62380		PD-HD
P19793		PD-HD
P20226		PD-HD
P05067		PD-HD
P07437		PD-HD
P10275		PD-HD
P19784		PD-HD
P00533		PD-HD
P01106		PD-HD
P02649		PD-HD
P04637		PD-HD
O00268		PD-HD
	PD-HD Count	30
P13569		AD-FTD
P02649		AD-FTD
P62993		AD-FTD
Q9H3D4		AD-FTD
Q9UJY4		AD-FTD
P11308		AD-FTD
P05067		AD-FTD
P63279		AD-FTD
	AD-FTD Count	8
P00533		AD-HD
P05067		AD-HD
Q06481		AD-HD
P00747		AD-HD
P01584		AD-HD
P62993		AD-HD
P02649		AD-HD
P11021		AD-HD
	AD-HD Count	8
Q5VTD9		FTP-PD
P54259		FTP-PD
O60260		FTP-PD
P13473		FTP-PD
P62988		FTP-PD
P05067		FTP-PD
P68400		FTP-PD
P46821		FTP-PD
P62258		FTP-PD
P37840		FTP-PD
P19174		FTP-PD
P11142		FTP-PD
P63104		FTP-PD
Q15418		FTP-PD
Q16695		FTP-PD
P34932		FTP-PD
Q13616		FTP-PD
Q9UNE7		FTP-PD
P67775		FTP-PD
O00141		FTP-PD
P23508		FTP-PD
Q14164		FTP-PD
Q9Y4K3		FTP-PD
P07900		FTP-PD
P28702		FTP-PD
Q15653		FTP-PD
P42574		FTP-PD
Q92956		FTP-PD
P62993		FTP-PD
P29466		FTP-PD
Q969H0		FTP-PD
Q14790		FTP-PD
P10636		FTP-PD
Q00535		FTP-PD
P35222		FTP-PD
O60716		FTP-PD
Q07817		FTP-PD
Q16623		FTP-PD
P08107		FTP-PD
O43236		FTP-PD
P63279		FTP-PD
P10275		FTP-PD
	FTP-PD Count	42
P25685		ALS-PD
P62988		ALS-PD
P31946		ALS-PD
P16220		ALS-PD
P42574		ALS-PD
Q92956		ALS-PD
Q16512		ALS-PD
P61764		ALS-PD
P28482		ALS-PD
P07197		ALS-PD
P40337		ALS-PD
Q12933		ALS-PD
P62993		ALS-PD
P10636		ALS-PD
P08670		ALS-PD
Q01082		ALS-PD
Q8NFJ9		ALS-PD
P01106		ALS-PD
P54257		ALS-PD
P19174		ALS-PD
Q16695		ALS-PD
P18206		ALS-PD
P49841		ALS-PD
P56537		ALS-PD
O60739		ALS-PD
Q04206		ALS-PD
P35222		ALS-PD
Q13322		ALS-PD
P67809		ALS-PD
P19793		ALS-PD
P23246		ALS-PD
P24928		ALS-PD
P17947		ALS-PD
P63279		ALS-PD
P10275		ALS-PD
Q16623		ALS-PD
	ALS-PD Count	36
P62993		P-ALS
	P-ALS Count	1
P11021		AD-P
P05067		AD-P
Q06481		AD-P
P00747		AD-P
P02649		AD-P
P62993		AD-P
	AD-P Count	6
P62993		P-GBM
Q03135		P-GBM
O00213		P-GBM
	P-GBM Count	3
P62380		P-HD
Q9ULW3		P-HD
P62993		P-HD
	P-HD Count	3
P49639		P-FTD
Q9NPF8		P-FTD
P19784		P-FTD
Q53QZ3		P-FTD
P05067		P-FTD
P68400		P-FTD
Q96A73		P-FTD
P02649		P-FTD
Q96L34		P-FTD
P62993		P-FTD
O94985		P-FTD
	P-FTD Count	11
Q9NPF8		P-LBD
P19784		P-LBD
Q53QZ3		P-LBD
P05067		P-LBD
P68400		P-LBD
Q96A73		P-LBD
	P-LBD Count	6
P62993		P-PD
P02649		P-PD
Q96L34		P-PD
P05067		P-PD
P62380		P-PD
P68400		P-PD
Q9NPF8		P-PD
P19784		P-PD
Q53QZ3		P-PD
Q96A73		P-PD
Q9ULW3		P-PD
	P-PD Count	11
P46379		P-SMA
	P-SMA Count	1
Q15796		AD_ALS
P02787		AD_ALS
P63279		AD_ALS
P62993		AD_ALS
Q9H3D4		AD_ALS
	AD_ALS Count	5
Q15796		AD-GBM
P00533		AD-GBM
P62993		AD-GBM
	AD-GBM Count	3
P05067		AD-LBD
P11308		AD-LBD
	AD-LBD Count	2
P00450		AD-SMA
P63279		AD-SMA
	AD-SMA Count	2
P02649		HD-FTD
Q96L34		HD-FTD
P05067		HD-FTD
P49639		HD-FTD
P62258		HD-FTD
Q9NPF8		HD-FTD
P19784		HD-FTD
Q53QZ3		HD-FTD
P68400		HD-FTD
Q96A73		HD-FTD
P42574		HD-FTD
P29466		HD-FTD
P31749		HD-FTD
P07437		HD-FTD
P55212		HD-FTD
P62993		HD-FTD
O94985		HD-FTD
Q15653		HD-FTD
P10275		HD-FTD
P63165		HD-FTD
	HD-FTD Count	20
P04637		HD-GBM
Q14686		HD-GBM
Q15788		HD-GBM
O60869		HD-GBM
P19793		HD-GBM
P06400		HD-GBM
Q9Y6Q9		HD-GBM
P03372		HD-GBM
P84022		HD-GBM
P62993		HD-GBM
Q96CV9		HD-GBM
P07437		HD-GBM
Q92793		HD-GBM
O75376		HD-GBM
P00533		HD-GBM
P20936		HD-GBM
P78352		HD-GBM
Q03135		HD-GBM
O00213		HD-GBM
	HD-GBM Count	19
P62993		HD-ALS
P54257		HD-ALS
P01106		HD-ALS
P19793		HD-ALS
Q04206		HD-ALS
P24928		HD-ALS
P17947		HD-ALS
P10275		HD-ALS
P42574		HD-ALS
P63165		HD-ALS
	HD-ALS Count	10
P62258		HD-LBD
Q9NPF8		HD-LBD
P19784		HD-LBD
Q53QZ3		HD-LBD
P05067		HD-LBD
P68400		HD-LBD
Q96A73		HD-LBD
	HD-LBD Count	7
Q16594		HD-SMA
P24928		HD-SMA
P04637		HD-SMA
Q08211		HD-SMA
Q9BY11		HD-SMA
P46379		HD-SMA
	HD-SMA Count	6
P46109		FTD-GBM
P06241		FTD-GBM
P62988		FTD-GBM
P45983		FTD-GBM
P28482		FTD-GBM
Q9UQF2		FTD-GBM
Q14289		FTD-GBM
P43405		FTD-GBM
P09769		FTD-GBM
P06493		FTD-GBM
P00519		FTD-GBM
P07437		FTD-GBM
Q9UNE7		FTD-GBM
P16885		FTD-GBM
P19174		FTD-GBM
O96017		FTD-GBM
P38398		FTD-GBM
P28702		FTD-GBM
O60674		FTD-GBM
P26045		FTD-GBM
Q9Y2R2		FTD-GBM
P07900		FTD-GBM
P50616		FTD-GBM
P21333		FTD-GBM
P62993		FTD-GBM
P12830		FTD-GBM
P14923		FTD-GBM
P27986		FTD-GBM
P35221		FTD-GBM
P35222		FTD-GBM
	FTD-GBM Count	30
P62988		FTD-ALS
P31946		FTD-ALS
P28482		FTD-ALS
P08670		FTD-ALS
Q01082		FTD-ALS
P10636		FTD-ALS
P42574		FTD-ALS
Q16512		FTD-ALS
P61764		FTD-ALS
P19174		FTD-ALS
P49841		FTD-ALS
Q9NV58		FTD-ALS
Q9UNZ2		FTD-ALS
Q9UBN7		FTD-ALS
Q9H3D4		FTD-ALS
Q8IVM0		FTD-ALS
O15503		FTD-ALS
Q13190		FTD-ALS
P62330		FTD-ALS
P30480		FTD-ALS
P10415		FTD-ALS
P62993		FTD-ALS
P55210		FTD-ALS
P49662		FTD-ALS
P35222		FTD-ALS
Q16623		FTD-ALS
Q8NFJ9		FTD-ALS
	FTD-ALS Count	27
P37840		FTD-LBD
P05067		FTD-LBD
P62988		FTD-LBD
O60716		FTD-LBD
Q07817		FTD-LBD
P10636		FTD-LBD
	FTD-LBD Count	6
P62988		FTD-SMA
P22695		FTD-SMA
P06241		FTD-SMA
P07948		FTD-SMA
P62158		FTD-SMA
Q9UNE7		FTD-SMA
P63104		FTD-SMA
P06493		FTD-SMA
P49841		FTD-SMA
P38398		FTD-SMA
O15503		FTD-SMA
Q13190		FTD-SMA
P27824		FTD-SMA
P32121		FTD-SMA
A0JLT2		FTD-SMA
P35222		FTD-SMA
Q16623		FTD-SMA
P10415		FTD-SMA
P63279		FTD-SMA
	FTD-SMA Count	19
Q15796		GBM-ALS
P62988		GBM-ALS
P62993		GBM-ALS
P53350		GBM-ALS
P28482		GBM-ALS
P19793		GBM-ALS
P50616		GBM-ALS
P19174		GBM-ALS
O75815		GBM-ALS
P35222		GBM-ALS
Q14451		GBM-ALS
Q9Y490		GBM-ALS
	GBM-ALS Count	12
Q9NRD5		GBM-FA
	GBM-FA Count	1
P62988		GBM-LBD
P06241		GBM-LBD
P28482		GBM-LBD
P45983		GBM-LBD
Q9UQF2		GBM-LBD
Q14289		GBM-LBD
P43405		GBM-LBD
P09769		GBM-LBD
	GBM-LBD Count	8
P62988		GBM-SMA
Q99728		GBM-SMA
P38398		GBM-SMA
P06493		GBM-SMA
Q9BXW9		GBM-SMA
P04637		GBM-SMA
P06241		GBM-SMA
P08238		GBM-SMA
P35222		GBM-SMA
Q9UNE7		GBM-SMA
P06239		GBM-SMA
P12931		GBM-SMA
	GBM-SMA Count	12
P12814		ALS-FA
	ALS-FA Count	1
P62988		ALS-LBD
P31946		ALS-LBD
P28482		ALS-LBD
P08670		ALS-LBD
Q01082		ALS-LBD
P10636		ALS-LBD
	ALS-LBD Count	6
Q9NRD5		FA-PD
	FA-PD Count	1
Q9UNE7		PD-SMA
P68036		PD-SMA
P62988		PD-SMA
Q9Y385		PD-SMA
P63104		PD-SMA
P06493		PD-SMA
P49841		PD-SMA
P62158		PD-SMA
P06241		PD-SMA
P46527		PD-SMA
P63279		PD-SMA
P04637		PD-SMA
Q16594		PD-SMA
P35222		PD-SMA
P22695		PD-SMA
P07948		PD-SMA
Q15287		PD-SMA
P23246		PD-SMA
Q7Z6E9		PD-SMA
Q7L5N1		PD-SMA
P46934		PD-SMA
Q16623		PD-SMA
P24928		PD-SMA
Q08211		PD-SMA
	PD-SMA Count	24
P62988		LBD-SMA
P22695		LBD-SMA
P06241		LBD-SMA
P07948		LBD-SMA
P62158		LBD-SMA
	LBD-SMA Count	5
O60260		LBD-PD
P13473		LBD-PD
P62988		LBD-PD
P05067		LBD-PD
P68400		LBD-PD
P46821		LBD-PD
P62258		LBD-PD
P37840		LBD-PD
P08107		LBD-PD
O43236		LBD-PD
	LBD-PD Count	10
P62988		ALS-SMA
P10415		ALS-SMA
A0JLT2		ALS-SMA
P49841		ALS-SMA
P35222		ALS-SMA
P24928		ALS-SMA
O15264		ALS-SMA
P25054		ALS-SMA
Q13322		ALS-SMA
P23246		ALS-SMA
Q12906		ALS-SMA
P07947		ALS-SMA
P63279		ALS-SMA
	ALS-SMA Count	13
O60869		GBM-PD
P00519		GBM-PD
P00533		GBM-PD
P03372		GBM-PD
P04637		GBM-PD
P06241		GBM-PD
P06400		GBM-PD
P06493		GBM-PD
P07437		GBM-PD
P07900		GBM-PD
P09769		GBM-PD
P16333		GBM-PD
P16885		GBM-PD
P19174		GBM-PD
P19793		GBM-PD
P20248		GBM-PD
P24864		GBM-PD
P28482		GBM-PD
P28702		GBM-PD
P35222		GBM-PD
P43405		GBM-PD
P45983		GBM-PD
P51784		GBM-PD
P56524		GBM-PD
P62988		GBM-PD
P62993		GBM-PD
P78352		GBM-PD
Q09472		GBM-PD
Q14289		GBM-PD
Q14686		GBM-PD
Q15717		GBM-PD
Q15788		GBM-PD
Q92793		GBM-PD
Q92905		GBM-PD
Q96S59		GBM-PD
Q9NRD5		GBM-PD
Q9UNE7		GBM-PD
Q9UQF2		GBM-PD
Q9Y618		GBM-PD
Q9Y6Q9		GBM-PD
	GBM-PD Count	40
	Grand Count	462
