# Supplementary material for: Network Analysis of Neurodegenerative Disease Highlights a Role of Toll-Like Receptor Signaling
Source: Biomed Res Int. 2014 Jan 16;2014:686505. doi: 10.1155/2014/686505 (PMC3914352; doi:10.1155/2014/686505)
Supplement: Supplementary file 1 — Suppl 1: The list of disease proteins and their corresponding diseases. Suppl 2: The lists of disease proteins occurring in the six corresponding components. Suppl 3: The computations and distribution diagrams for network centrality indices. Each worksheet presents one centrality. Suppl 4: The list of connector proteins of the different diseases. Suppl 5: The ranking of disease association using the network-based approach and the text mining approach. The same disease pair in the different rows is highlighted by the same color. Suppl 6: Network of significantly enriched GO terms. This schematic network illustrates GO terms that were significantly enriched in the ALS-PD (A) and FTD-PD (B) connector proteins, as well as the overlap between related terms. GO terms containing at least 10 connector proteins, and occurring in levels 3-8 of the GO hierarchy were considered in the analysis. Terms that were significantly enriched (p<0.05 after correction for multiple testing) with connector proteins are depicted. Node colours and inset bar indicate the p value for enrichment of each term, after correction for multiple testing. [file 686505.f1.zip › Suppl5_DiseaseAssociationRanking.xlsx]

## Sheet: Sheet1
NETWORK ANALYSIS							TEXT MINING
Disease1	Disease2	l = 0	l=1	l = 2			Disease1	Disease2
FTD	PD	5	9	85			P	LBD
FTD	ALS	3	2	45			FTD	LBD
LBD	PD	2	6	17			P	FTD
FTD	LBD	2	3	9			AD	P
ALS	PD	2	2	57			LBD	PD
HD	PD	1	2	41			AD	LBD
ALS	SMA	1	0	18			HD	LBD
P	HD	1	0	3			HD	FA
PD	SMA	0	1	44			HD	P
HD	GBM	0	1	23			HD	FTD
P	GBM	0	1	4			FTD	ALS
GBM	PD	0	0	64			AD	FTD
FTD	GBM	0	0	43			HD	PD
FTD	SMA	0	0	32			FTD	PD
HD	FTD	0	0	28			ALS	SMA
AD	PD	0	0	18			FA	SMA
GBM	ALS	0	0	18			FTD	SMA
P	PD	0	0	17			P	PD
AD	FTD	0	0	16			AD	HD
HD	ALS	0	0	16			AD	PD
GBM	SMA	0	0	15			FA	PD
P	FTD	0	0	14			HD	GBM
AD	HD	0	0	11			FTD	FA
GBM	LBD	0	0	9			AD	FA
HD	SMA	0	0	8			ALS	LBD
HD	LBD	0	0	8			AD	GBM
AD	P	0	0	8			P	FA
ALS	LBD	0	0	7			HD	SMA
P	LBD	0	0	7			P	ALS
AD	ALS	0	0	6			PD	SMA
LBD	SMA	0	0	6			ALS	PD
AD	LBD	0	0	5			P	GBM
AD	GBM	0	0	4			HD	ALS
AD	SMA	0	0	2			ALS	FA
P	ALS	0	0	2			FA	LBD
FA	PD	0	0	1			FTD	GBM
P	SMA	0	0	1			GBM	LBD
ALS	FA	0	0	1			GBM	FA
GBM	FA	0	0	1			AD	ALS
FTD	FA	0	0	0			AD	SMA
AD	FA	0	0	0			GBM	SMA
FA	SMA	0	0	0			GBM	PD
HD	FA	0	0	0			GBM	ALS
P	FA	0	0	0			LBD	SMA
FA	LBD	0	0	0			P	SMA
